# Supplementary material for: Non-Targeted Chemical Characterization of JUUL-Menthol-Flavored Aerosols Using Liquid and Gas Chromatography
Source: MDPI journal article supplement (doi:10.3390/separations9110367), 2022-11-11
Supplement: s1 [file s1]

## SUPPLEMENTAL MATERIALS

### LC-HRMS

LC-HRMS systems consisted of a Thermo Q-Exactive mass spectrometer coupled to a Thermo Vanquish Horizon-Class liquid chromatograph with an autosampler and heated column compartment. The separation was performed using a Waters BEH C18 (2.1 x 100 mm, 1.7  $\mu$ m) column.

**Table S1a Liquid Chromatographic Conditions**

| Column Compartment |                                                                            |
|--------------------|----------------------------------------------------------------------------|
| Column             | Acquity UPLC BEH C18 1.7 $\mu$ m 2.1 x 100 mm                              |
| Guard column       | Acquity UPLC BEH C18 VanGuard Pre-column, 130Å, 1.7 $\mu$ m, 2.1 mm X 5 mm |
| Column Temp        | 50 °C                                                                      |
| Auto Sampler       |                                                                            |
| Wash Mode          | Both                                                                       |
| Wash Speed         | 50.0 $\mu$ L/sec                                                           |
| Wash Time          | 2 sec                                                                      |
| Dispense Speed     | 10.0 $\mu$ L/sec                                                           |
| Draw Speed         | 0.666 $\mu$ L/sec                                                          |
| Injection Volume   | 0.1 $\mu$ L                                                                |
| Sample Temp        | 10 °C                                                                      |
| Pump Solvents      |                                                                            |
| Needle Wash        | 1:1:1:1<br>Water:Methanol:Acetonitrile:Isopropanol                         |
| Seal Wash          | 75:25 Isopropanol:Water                                                    |
| Mobile Phase A1    | 5 mM Ammonium Acetate, pH 8.5                                              |
| Mobile Phase B1    | Methanol                                                                   |

**Table S1b Liquid Chromatographic Conditions**

| Mobile Phase Gradient |    |    |                    |       |
|-----------------------|----|----|--------------------|-------|
| Time (min)            | %A | %B | Flow Rate (mL/min) | Curve |
| 0.00                  | 95 | 5  | 0.200              | 5     |
| 20.00                 | 20 | 80 | 0.200              | 5     |
| 22.00                 | 20 | 80 | 0.200              | 5     |

|       |    |   |       |   |
|-------|----|---|-------|---|
| 22.01 | 95 | 5 | 0.200 | 5 |
| 26.00 | 95 | 5 | 0.200 | 5 |

### Q-Exactive Mass Spectrometer

Table S2a. Spectrometer Parameters

|                      |                                 |
|----------------------|---------------------------------|
| Acquisition Mode     | Full Scan and ddMS <sup>2</sup> |
| Sheath Gas Flow Rate | 50                              |
| Aux Gas Flow Rate    | 15                              |
| Sweep Gas Flow Rate  | 5                               |
| Spray Voltage        | 3,500 V                         |
| Mass/Charge Range    | 60-800                          |
| Capillary temp       | 320 °C                          |
| S-Lens RF Level      | 50.0                            |
| Aux gas heater temp  | 250 °C                          |

Table S2b. Mass Spectrometer parameters for full scan acquisition

|                       |                 |
|-----------------------|-----------------|
| Acquisition Mode      | Full Scan       |
| Tune File             | pos_ESI_rev1    |
| Divert valve          | 2 min to 23 min |
| Chrom peak width      | 5 sec           |
| Run Time              | 2 min to 23 min |
| Polarity              | Positive        |
| In Source CID         | 0 V             |
| Micro-scans           | 1               |
| Resolution            | 140,000         |
| AGC Target            | 1E6             |
| Max IT                | 400 ms          |
| Number of Scan Ranges | 1               |
| Scan Range            | 60 to 800 m/z   |
| Spectrum Data Type    | Profile         |

Table S2c. Mass Spectrometer parameters for data dependent ddMS<sup>2</sup> scan acquisition

|                   |                             |
|-------------------|-----------------------------|
| Acquisition Mode  | Full Scan→ddMS <sup>2</sup> |
| Tune File         | pos_ESI_rev1*               |
| User Role         | Advanced                    |
| Divert valve      | 2 min to 23 min             |
| Chrom. Peak width | 5 sec                       |

|                       |                 |
|-----------------------|-----------------|
| Run Time              | 2 min to 23 min |
| Polarity              | Positive        |
| In Source CID         | 0 V             |
| Full MS               |                 |
| Micro-scans           | 1               |
| Resolution            | 70,000          |
| AGC Target            | 3E6             |
| Max IT                | 100 ms          |
| Number of Scan Ranges | 1               |
| Scan Range            | 60 to 800 m/z   |
| Spectrum Data Type    | Profile         |
| dd-MS <sup>2</sup>    |                 |
| Micro-scans           | 1               |
| Resolution            | 17,500          |
| AGC Target            | 1E5             |
| Max IT                | 150 ms          |
| Loop Count            | 10              |
| MSX                   | 1               |
| Isolation Window      | 1.2 m/z         |
| Isolation Offset      | 0               |
| NCE/Stepped           | NCE: 25, 50, 75 |
| Spectrum Data Type    | Profile         |
| dd-Setting            |                 |
| Min AGC target        | 1E3             |
| Intensity Threshold   | 6.7E3           |
| Exclude Isotopes      | On              |
| Dynamic Exclusion     | 10.0 sec        |

## GC-MS

GC-MS systems consisted of an Agilent 7890GC/5977MSD gas chromatograph equipped with an electron ionization (EI) source. The separation was performed using a Restek Stabilwax (30m x 0.25mm x 0.25µm) column with a Restek (5 meter) integra guard column. All GC-MS NTA data were collected by Altria Client Services, LLC. using their validated and it is published method [8].

Table S3a. Gas Chromatograph Parameters

|                    |                                 |
|--------------------|---------------------------------|
| Column             | Stabilwax 30m x 0.25mm x 0.25µm |
| Injection Volume   | 1 µL                            |
| Inlet Temp         | 260°C                           |
| Inlet Mode         | Split (5:1)                     |
| Flow Control Mode  | Constant Flow                   |
| Column Flow        | 1.2 mL/min                      |
| Transfer Line Temp | 260°C                           |
| Oven Program       |                                 |

|                      |                                |
|----------------------|--------------------------------|
| <b>Initial Temp</b>  | 60°C – Hold 1.25 min           |
| <b>Ramp 1</b>        | 15°C/min to 210°C – Hold 2 min |
| <b>Ramp 2</b>        | 30°C/min to 260°C – Hold 9 min |
| <b>Analysis Time</b> | 23.92 min                      |

**Table S3b. Mass Spectrometer Parameters**

|                         |             |
|-------------------------|-------------|
| <b>Acquisition Mode</b> | Scan        |
| <b>Tune File</b>        | etune.u     |
| <b>Solvent Delay</b>    | 2.90 min    |
| <b>EMV Mode</b>         | Gain Factor |
| <b>Gain Factor</b>      | 2.00        |
| <b>Mass Range</b>       | 35-450      |
| <b>Threshold</b>        | 100         |
| <b>Sample #</b>         | 2           |
| <b>MS Source Temp</b>   | 230°C       |
| <b>MS Quad Temp</b>     | 150°C       |

**Table S4 GC-MS Characterization of Aerosol Collected Under Intense Puffing Regime from Three Batches of Menthol 3.0% at T=0**

| Library Retention Time (min) | Compound                                 | CAS#       | Identification Confidence | Batch HJ10PG06B |              |              | Batch HJ10PH06B |              |              | Batch HJ10PI06B |              |              | Avg (µg/g) | Stdev | Group | Rationalization                                |
|------------------------------|------------------------------------------|------------|---------------------------|-----------------|--------------|--------------|-----------------|--------------|--------------|-----------------|--------------|--------------|------------|-------|-------|------------------------------------------------|
|                              |                                          |            |                           | Rep-1 (µg/g)    | Rep-2 (µg/g) | Rep-3 (µg/g) | Rep-1 (µg/g)    | Rep-2 (µg/g) | Rep-3 (µg/g) | Rep-1 (µg/g)    | Rep-2 (µg/g) | Rep-3 (µg/g) |            |       |       |                                                |
| 3.72                         | Decamethylcyclopentasiloxane Isomer 3    | 541-02-6   | CONFIRMED                 | ND              | ND           | ND           | 12.6            | ND           | ND           | ND              | ND           | ND           | 12.6       | 0.0   | 3     | E&L                                            |
| 4.08                         | Pyridine                                 | 110-86-1   | CONFIRMED                 | ND              | ND           | ND           | 1.6             | 1.2          | 1.0          | ND              | ND           | ND           | 1.2        | 0.3   | 1     | Flavorant                                      |
| 4.14                         | 1,8-Cineole                              | 470-82-6   | HIGH                      | 0.7             | 0.8          | 0.8          | 0.9             | 0.7          | ND           | 0.7             | ND           | ND           | 0.8        | 0.1   | 1     | Flavorant                                      |
| 5.04                         | Hydroxyacetone                           | 116-09-6   | CONFIRMED                 | 8.1             | 9.1          | 10.2         | 15.8            | 9.6          | 8.3          | 10.0            | 9.1          | 8.8          | 9.9        | 2.3   | 4     | dehydration of glycerol and/or oxidation of PG |
| 5.32                         | Dodecamethylcyclohexasiloxane Isomer 1   | 540-97-6   | HIGH                      | 23.8            | 23.2         | 24.1         | 31.8            | 26.0         | 13.0         | 19.1            | 10.3         | 15.6         | 20.8       | 6.8   | 3     | E&L                                            |
| 6.50                         | Acetic acid                              | 64-19-7    | CONFIRMED                 | 16.6            | 8.3          | 9.0          | 9.3             | 5.5          | 8.1          | ND              | ND           | 8.2          | 9.3        | 3.4   | 1     | Flavorant                                      |
| 6.60                         | 2-ethyl-1-hexanol                        | 104-76-7   | CONFIRMED                 | 0.7             | 0.8          | 0.7          | ND              | ND           | ND           | 0.8             | ND           | 0.7          | 0.8        | 0.0   | 3     | E&L                                            |
| 6.63                         | Menthone                                 | 89-80-5    | CONFIRMED                 | 21.9            | 24.0         | 22.7         | 25.7            | 22.5         | 18.8         | 22.1            | 20.2         | 20.5         | 22.0       | 2.1   | 4     | oxidized menthol                               |
| 6.70                         | Menthofuran                              | 494-90-6   | CONFIRMED                 | 1.2             | 1.4          | 1.3          | 1.6             | 1.3          | 1.0          | 1.3             | 1.2          | 1.2          | 1.3        | 0.2   | 1     | Flavorant                                      |
| 6.79                         | Isomenthone                              | 491-07-6   | CONFIRMED                 | 6.9             | 7.3          | 7.1          | 8.0             | 7.0          | 5.7          | 6.8             | 6.2          | 6.1          | 6.8        | 0.7   | 1     | Flavorant                                      |
| 6.80                         | Tetradecamethylcycloheptasiloxane        | 107-50-6   | CONFIRMED                 | ND              | ND           | 8.5          | 8.9             | ND           | ND           | ND              | ND           | ND           | 8.7        | 0.3   | 3     | E&L                                            |
| 7.07                         | 1,3Dioxolane-2methanol_2,4dimethyl-Iso1  | 53951-43-2 | MEDIUM                    | 2.7             | 3.2          | 3.1          | 3.6             | 3.1          | 2.5          | 2.0             | 1.8          | 1.9          | 2.6        | 0.6   | 4     | PG degradant                                   |
| 7.20                         | Linalool                                 | 78-70-6    | CONFIRMED                 | 1.0             | 1.1          | 1.0          | 1.2             | 1.1          | 0.8          | 1.1             | 0.9          | 1.0          | 1.0        | 0.1   | 1     | Flavorant                                      |
| 7.31                         | Linalyl acetate                          | 115-95-7   | CONFIRMED                 | 1.5             | 1.6          | 1.5          | 1.7             | 1.5          | 1.3          | 1.5             | 1.3          | 1.5          | 1.5        | 0.1   | 1     | Flavorant                                      |
| 7.40                         | Menthyl acetate                          | 89-48-5    | CONFIRMED                 | 3.6             | 3.8          | 3.7          | 4.2             | 3.7          | 3.1          | 3.7             | 3.3          | 3.3          | 3.6        | 0.3   | 1     | Flavorant                                      |
| 7.56                         | 1,3-Dioxolane-4-methanol_2,2-dimethyl-   | 100-79-8   | CONFIRMED                 | 47.8            | 62.4         | 35.6         | 66.6            | 53.0         | 34.5         | 5.5             | 4.9          | 9.0          | 35.5       | 24.2  | 4     | VG degradant                                   |
| 7.60                         | Isopulegol Isomer                        | 7786-67-6  | CONFIRMED                 | ND              | 0.8          | ND           | 0.8             | 0.8          | ND           | ND              | ND           | ND           | 0.8        | 0.0   | 4     | reduction of isopulegone                       |
| 7.68                         | Ethanone_1-(2-pyridinyl)-                | 1122-62-9  | CONFIRMED                 | 17.0            | 19.3         | 18.9         | 21.6            | 18.2         | 15.0         | 18.0            | 15.6         | 17.0         | 17.8       | 2.0   | 1     | Flavorant                                      |
| 7.78                         | Terpinen-4-ol                            | 562-74-3   | CONFIRMED                 | 1.0             | 1.3          | ND           | 1.1             | ND           | ND           | 1.1             | ND           | ND           | 1.1        | 0.1   | 1     | Flavorant                                      |
| 7.80                         | Unknown Menthol Related Comp (RRT 0.520) | NA         | NA                        | 4.2             | 5.3          | 5.9          | 8.7             | 4.7          | 4.9          | 5.7             | 6.3          | 4.4          | 5.6        | 1.4   | 4     | Menthol (Flavorant) reaction                   |

**Table S4 GC-MS Characterization of Aerosol Collected Under Intense Puffing Regime from Three Batches of Menthol 3.0% at T=0**

| Library Retention Time (min) | Compound                                | CAS#       | Identification Confidence | Batch HJ10PG06B |              |              | Batch HJ10PH06B |              |              | Batch HJ10PI06B |              |              | Avg (µg/g) | Stdev | Group | Rationalization                                                                                                  |
|------------------------------|-----------------------------------------|------------|---------------------------|-----------------|--------------|--------------|-----------------|--------------|--------------|-----------------|--------------|--------------|------------|-------|-------|------------------------------------------------------------------------------------------------------------------|
|                              |                                         |            |                           | Rep-1 (µg/g)    | Rep-2 (µg/g) | Rep-3 (µg/g) | Rep-1 (µg/g)    | Rep-2 (µg/g) | Rep-3 (µg/g) | Rep-1 (µg/g)    | Rep-2 (µg/g) | Rep-3 (µg/g) |            |       |       |                                                                                                                  |
| 7.91                         | Acetylpyrazine                          | 22047-25-2 | CONFIRMED                 | 2.1             | 2.4          | 2.3          | 2.6             | 2.1          | 1.9          | 2.2             | 1.8          | 2.2          | 2.2        | 0.2   | 1     | Flavorant                                                                                                        |
| 8.24                         | Lavandulol                              | 498-16-8   | CONFIRMED                 | 2.6             | 3.0          | 3.0          | 3.0             | 2.2          | 2.0          | 2.3             | 2.1          | 2.4          | 2.5        | 0.4   | 1     | Flavorant                                                                                                        |
| 8.20                         | 5-Methyl-2-(1-methylethyl)-Cyclohexanol | 1490-04-6  | CONFIRMED                 | 4.1             | 5.0          | 4.3          | 5.6             | 4.7          | 3.6          | 4.7             | 3.4          | 4.0          | 4.4        | 0.7   | 1     | Isomer of menthol (Flavorant)                                                                                    |
| 8.21                         | Pulegone                                | 89-82-7    | CONFIRMED                 | 2.5             | 3.0          | 3.1          | 2.2             | 3.1          | 2.5          | 2.7             | 2.5          | 2.8          | 2.7        | 0.3   | 1     | Flavorant                                                                                                        |
| 8.31                         | Hexadecamethylcyclooctasil oxane        | 556-68-3   | CONFIRMED                 | 1.7             | 1.5          | 2.9          | 3.4             | 1.4          | ND           | 1.3             | ND           | 1.3          | 1.9        | 0.9   | 3     | E&L                                                                                                              |
| 8.45                         | Diethoxydimethylsilane                  | 78-62-6    | CONFIRMED                 | ND              | ND           | ND           | ND              | ND           | ND           | ND              | 0.8          | ND           | 0.8        | 0.0   | 3     | E&L                                                                                                              |
| 8.47                         | Terpinyl propionate                     | 80-27-3    | MEDIUM                    | 0.8             | 1.6          | 1.1          | 1.2             | 1.0          | 0.8          | 0.9             | 1.2          | 1.2          | 1.1        | 0.3   | 1     | Flavorant                                                                                                        |
| 8.47                         | Unknown (RRT 0.559)                     | NA         | NA                        | ND              | ND           | ND           | 1.0             | ND           | ND           | 0.9             | ND           | 0.8          | 0.9        | 0.1   | 5     | NR                                                                                                               |
| 8.56                         | Borneol                                 | 464-45-9   | CONFIRMED                 | ND              | 0.7          | ND           | ND              | ND           | ND           | ND              | ND           | ND           | 0.7        | 0.0   | 4     | α-pinene protonation, capture of this carbocation by H2O accompanied by rearrangement of bicyclo carbon skeleton |
| 8.66                         | Nicotinealdehyde                        | 500-22-1   | CONFIRMED                 | 1.2             | 1.0          | 1.0          | 1.1             | 1.0          | 0.8          | 1.0             | 0.8          | 0.9          | 1.0        | 0.1   | 4     | demethylation of 3-acetylpyridine                                                                                |
| 8.80                         | Piperitone                              | 89-81-6    | CONFIRMED                 | ND              | ND           | 0.7          | 0.8             | ND           | ND           | ND              | ND           | ND           | 0.8        | 0.0   | 1     | Flavorant                                                                                                        |
| 9.36                         | Dipropylene glycol                      | 110-98-5   | CONFIRMED                 | 39.0            | 42.6         | 42.0         | ND              | 40.5         | 33.8         | 39.8            | 35.5         | 37.7         | 38.8       | 3.1   | 4     | PG degradant                                                                                                     |
| 9.40                         | beta-Damascenone                        | 23726-93-4 | CONFIRMED                 | 3.6             | 4.0          | 3.9          | 4.4             | 3.8          | 3.1          | 3.7             | 3.3          | 3.5          | 3.7        | 0.4   | 1     | Flavorant                                                                                                        |
| 9.50                         | Octadecamethylcyclononasiloxane         | 556-71-8   | CONFIRMED                 | ND              | ND           | ND           | 0.8             | ND           | ND           | ND              | ND           | ND           | 0.8        | 0.0   | 3     | E&L                                                                                                              |
| 9.52                         | N,2,3-trimethyl-2-isopropylbutamide     | 51115-67-4 | CONFIRMED                 | 77.0            | 87.4         | 83.3         | 99.0            | 83.0         | 69.2         | 81.3            | 73.4         | 77.4         | 81.2       | 8.7   | 1     | Flavorant                                                                                                        |
| 9.61                         | (Z)-beta-damascone                      | 23726-92-3 | CONFIRMED                 | 14.5            | 15.2         | 15.7         | 33.3            | 15.5         | 12.9         | 15.3            | 13.6         | 14.5         | 16.7       | 6.3   | 1     | Flavorant                                                                                                        |
| 9.95                         | 2-(4-methoxyphenyl)1-pyrroline          | NA         | MEDIUM                    | 3.0             | 2.6          | 2.6          | 2.7             | 2.4          | 1.9          | 3.1             | 2.3          | 2.4          | 2.6        | 0.4   | 4     | Nicotine degradant                                                                                               |
| 10.53                        | N-methyl-4-(3-pyridyl)-3-buten-1-amine  | 15585-43-0 | HIGH                      | 2.6             | 2.8          | 2.8          | 2.9             | 2.6          | 2.1          | 2.5             | 2.3          | 2.4          | 2.5        | 0.3   | 4     | Nicotine degradant                                                                                               |

**Table S4 GC-MS Characterization of Aerosol Collected Under Intense Puffing Regime from Three Batches of Menthol 3.0% at T=0**

| Library Retention Time (min) | Compound                                | CAS#       | Identification Confidence | Batch HJ10PG06B |              |              | Batch HJ10PH06B |              |              | Batch HJ10PI06B |              |              | Avg (µg/g) | Stddev | Group | Rationalization                    |
|------------------------------|-----------------------------------------|------------|---------------------------|-----------------|--------------|--------------|-----------------|--------------|--------------|-----------------|--------------|--------------|------------|--------|-------|------------------------------------|
|                              |                                         |            |                           | Rep-1 (µg/g)    | Rep-2 (µg/g) | Rep-3 (µg/g) | Rep-1 (µg/g)    | Rep-2 (µg/g) | Rep-3 (µg/g) | Rep-1 (µg/g)    | Rep-2 (µg/g) | Rep-3 (µg/g) |            |        |       |                                    |
| 10.55                        | N-Methylanabasine                       | 24380-92-5 | CONFIRMED                 | 1.7             | 2.0          | 1.9          | 2.1             | 1.8          | 1.5          | 1.8             | 1.6          | 1.7          | 1.8        | 0.2    | 4     | Nicotine degradant                 |
| 10.55                        | Phenol                                  | 108-95-2   | CONFIRMED                 | 0.9             | 1.0          | 1.0          | 1.7             | 1.0          | 1.1          | 1.1             | 1.2          | 1.1          | 1.1        | 0.2    | 2     | HPHC                               |
| 11.10                        | Unknown (RRT 0.724)                     | NA         | NA                        | 3.1             | 3.5          | 3.7          | 3.8             | 3.8          | 4.1          | 4.0             | 3.7          | 4.1          | 3.7        | 0.3    | 5     | NR                                 |
| 11.26                        | Triacetin                               | 102-76-1   | CONFIRMED                 | ND              | 2.2          | ND           | ND              | ND           | ND           | 1.1             | ND           | ND           | 1.6        | 0.8    | 4     | acetic acid + glycerol             |
| 11.30                        | Unknown Nic Related Comp.(RRT 0.743)    | NA         | NA                        | 1.7             | 1.2          | ND           | ND              | ND           | ND           | ND              | 0.9          | 0.8          | 1.2        | 0.4    | 4     | Nicotine degradant                 |
| 12.30                        | Piperonal                               | 120-57-0   | CONFIRMED                 | 2.5             | 2.9          | 2.7          | 3.3             | 2.7          | 2.2          | 2.6             | 2.3          | 2.6          | 2.6        | 0.3    | 1     | Flavorant                          |
| 12.70                        | Unknown Nic.Related Comp.(RRT 0.840)    | NA         | NA                        | 9.1             | 2.9          | 3.0          | 3.1             | 2.8          | ND           | 2.2             | 1.1          | 1.6          | 3.2        | 2.5    | 4     | Nicotine degradant                 |
| 12.70                        | 3-(1,3-dimethylpyrrol-2-yl)pyridine     | 78210-38-5 | CONFIRMED                 | 3.2             | 2.7          | 3.1          | 2.9             | 2.5          | 2.4          | 2.5             | 2.4          | 2.3          | 2.6        | 0.3    | 4     | Nicotine degradant                 |
| 13.57                        | Unknown Nic.Related Comp.(RRT 0.849)    | NA         | NA                        | 2.8             | ND           | 2.7          | 3.1             | 2.9          | 2.5          | 3.1             | 2.6          | 3.0          | 2.8        | 0.2    | 4     | Nicotine degradant                 |
| 13.90                        | 3-(1,3-dimethylpyrrol-2-yl)pyridine Iso | 78210-38-5 | HIGH                      | 2.1             | 2.0          | 2.1          | 2.5             | 2.0          | 1.8          | 1.9             | 2.0          | 2.0          | 2.0        | 0.2    | 4     | Nicotine degradant                 |
| 13.99                        | 2-hydroxypropyl benzoate                | 37086-84-3 | CONFIRMED                 | 6.5             | 7.7          | 8.1          | 8.9             | 7.6          | 6.2          | 6.5             | 6.6          | 6.5          | 7.2        | 0.9    | 4     | benzoic acid + PG (esterification) |
| 14.31                        | 1,3-Ethoxyethylideneglycerol            | NA         | MEDIUM                    | 2.0             | 4.1          | 1.1          | 4.2             | 4.1          | ND           | ND              | 3.0          | 3.1          | 3.1        | 1.2    | 4     | VG degradant                       |
| 14.41                        | Unknown Nic.Related Comp.(RRT 0.956)    | NA         | NA                        | ND              | 1.5          | ND           | ND              | ND           | ND           | ND              | ND           | ND           | 1.5        | 0.0    | 4     | Nicotine degradant                 |
| 14.53                        | p-Dioxane-2,5-dimethanol                | 14236-12-5 | CONFIRMED                 | 13.7            | 15.0         | 14.0         | 14.9            | 13.8         | 11.7         | 13.7            | 12.3         | 12.3         | 13.5       | 1.2    | 4     | 2VG dehydration                    |
| 14.60                        | Unknown Nic.Related Comp.(RRT 0.970)    | NA         | NA                        | 4.3             | 6.3          | 3.9          | 4.3             | 4.6          | 3.8          | 4.5             | 3.6          | 3.7          | 4.3        | 0.8    | 4     | Nicotine degradant                 |
| 14.66                        | N-Propylnormicotine                     | 91907-45-8 | CONFIRMED                 | 2.0             | 1.7          | 2.2          | 1.7             | 1.4          | 1.2          | 1.3             | 1.2          | ND           | 1.6        | 0.4    | 4     | Nicotine degradant                 |
| 14.70                        | Bis(2,6-hydroxymethyl)dioxane           | 54120-69-3 | CONFIRMED                 | 31.5            | 34.7         | 33.5         | 54.1            | 48.6         | 41.9         | 32.6            | 31.6         | 45.2         | 39.3       | 8.4    | 4     | 2VG dehydration                    |
| 14.72                        | Bis(2,6-hydroxymethyl)dioxane - Iso2    | 54120-69-3 | HIGH                      | 5.8             | 14.4         | 7.5          | 71.9            | 8.4          | 6.7          | 6.1             | 6.5          | 67.3         | 21.6       | 27.3   | 4     | 2VG dehydration                    |
| 14.89                        | Bis(2,6-hydroxymethyl)dioxane - Iso3    | 54120-69-3 | HIGH                      | 217.8           | 24.6         | 59.3         | 36.2            | 25.1         | 22.2         | 22.2            | 21.2         | 70.6         | 55.5       | 63.5   | 4     | 2VG dehydration                    |
| 15.00                        | Bis(2,6-hydroxymethyl)dioxane - Iso4    | 54120-69-3 | HIGH                      | 27.5            | 28.5         | 28.4         | 31.9            | 28.9         | 24.2         | 27.8            | 25.9         | 26.5         | 27.7       | 2.2    | 4     | 2VG dehydration                    |
| 15.19                        | Unknown Nic.Related Comp.(RRT 1.012)    | NA         | NA                        | 2.5             | 3.3          | 2.8          | 3.8             | 2.7          | 2.6          | 2.4             | 2.9          | 2.4          | 2.8        | 0.5    | 4     | Nicotine degradant                 |
| 15.20                        | Bis(2,6-hydroxymethyl)dioxane - Iso5    | 54120-69-3 | HIGH                      | 10.0            | 10.8         | 11.0         | 11.7            | 10.4         | 8.6          | 10.0            | 9.6          | 10.0         | 10.2       | 0.9    | 4     | 2VG dehydration                    |
| 16.50                        | Unknown Nic. Related Comp. (RRT 1.098)  | NA         | NA                        | ND              | ND           | ND           | ND              | ND           | ND           | 2.1             | ND           | 1.5          | 1.8        | 0.4    | 4     | Nicotine degradant                 |

**Table S4 GC-MS Characterization of Aerosol Collected Under Intense Puffing Regime from Three Batches of Menthol 3.0% at T=0**

| Library Retention Time (min) | Compound                                           | CAS#         | Identification Confidence | Batch HJ10PG06B |              |              | Batch HJ10PH06B |              |              | Batch HJ10PI06B |              |              | Avg (µg/g) | Stdev | Group | Rationalization                                    |
|------------------------------|----------------------------------------------------|--------------|---------------------------|-----------------|--------------|--------------|-----------------|--------------|--------------|-----------------|--------------|--------------|------------|-------|-------|----------------------------------------------------|
|                              |                                                    |              |                           | Rep-1 (µg/g)    | Rep-2 (µg/g) | Rep-3 (µg/g) | Rep-1 (µg/g)    | Rep-2 (µg/g) | Rep-3 (µg/g) | Rep-1 (µg/g)    | Rep-2 (µg/g) | Rep-3 (µg/g) |            |       |       |                                                    |
| 16.80                        | Hexadecanoic Acid                                  | 57-10-3      | CONFIRMED                 | 6.2             | 3.5          | 1.9          | 3.7             | 1.0          | 3.4          | 2.2             | 1.6          | 0.7          | 2.7        | 1.7   | 3     | E&L                                                |
| 17.36                        | Phenol_2-(1-phenylethyl)-                          | 4237-44-9    | CONFIRMED                 | ND              | ND           | ND           | ND              | ND           | 1.4          | ND              | ND           | ND           | 1.4        | 0.0   | 4     | Phenylethanol (from phenylethyl acetate ) + phenol |
| 17.50                        | 2-(beta nicotyrine)propan-2-one Iso-1 <sup>a</sup> | 2416242-88-9 | HIGH                      | 7.2             | 5.9          | 6.4          | 6.4             | 6.6          | 5.7          | 6.2             | 6.0          | 5.4          | 6.2        | 0.5   | 4     | Nicotine degradant                                 |
| 19.08                        | Caffeine                                           | 58-08-2      | CONFIRMED                 | 13.7            | 14.3         | 14.3         | 16.0            | 14.6         | 12.3         | 14.4            | 12.9         | 13.2         | 14.0       | 1.1   | 1     | Flavorant                                          |
| 19.80                        | 1-(beta nicotyrine)propan-2-one Iso-2 <sup>a</sup> | 2416242-88-9 | HIGH                      | 15.5            | 13.1         | 14.6         | 14.4            | 14.6         | 12.8         | 14.3            | 14.1         | 12.8         | 14.0       | 0.9   | 4     | Nicotine degradant                                 |

<sup>a</sup>1-(beta nicotyrine)propan-2-one: 1-(1-methyl-5-(pyridine-3-yl)-1H-pyrrol-2-yl)propan-2-one

<sup>a</sup>2-(beta nicotyrine)acetaldehyde: 2-(1-methyl-5-(pyridine-3-yl)-1H-pyrrol-2-yl)acetaldehyde

**Table S5 GC-MS Characterization of Aerosol Collected Under Non-Intense Puffing Regime from Three Batches of Menthol 3.0% at T=0**

| Library Retention Time (min) | Compound                                | CAS #    | Identification Confidence | Batch HJ10PG06B |              |              | Batch HJ10PH06B |              |              | Batch HJ10PI06B |              |              | Avg (µg/g) | Stdev | Group | Rationalization                                                          |
|------------------------------|-----------------------------------------|----------|---------------------------|-----------------|--------------|--------------|-----------------|--------------|--------------|-----------------|--------------|--------------|------------|-------|-------|--------------------------------------------------------------------------|
|                              |                                         |          |                           | Rep-1 (µg/g)    | Rep-2 (µg/g) | Rep-3 (µg/g) | Rep-1 (µg/g)    | Rep-2 (µg/g) | Rep-3 (µg/g) | Rep-1 (µg/g)    | Rep-2 (µg/g) | Rep-3 (µg/g) |            |       |       |                                                                          |
| 4.08                         | Pyridine                                | 110-86-1 | CONFIRMED                 | 1.3             | 1.0          | 0.9          | 1.0             | 1.1          | 1.0          | 1.2             | ND           | 1.2          | 1.1        | 0.1   | 1     | Flavorant                                                                |
| 5.04                         | Hydroxyacetone                          | 116-09-6 | CONFIRMED                 | 8.2             | 6.8          | 6.5          | 7.3             | 6.9          | ND           | 8.3             | 8.2          | 7.9          | 7.5        | 0.7   | 4     | dehydration of glycerol and/or oxidation of PG                           |
| 5.32                         | Dodecamethylcyclhexasiloxane Isomer 1   | 540-97-6 | HIGH                      | 18.0            | 15.6         | 15.3         | 17.4            | 17.1         | 17.6         | 18.6            | 17.4         | 17.3         | 17.1       | 1.1   | 3     | E&L                                                                      |
| 5.61                         | 1-((ethoxydimethylsilyl)oxy)propan-2-ol | NA       | MEDIUM                    | 1.2             | 1.1          | 1.0          | 0.9             | 1.0          | 1.0          | 1.0             | 0.9          | 0.9          | 1.0        | 0.1   | 4     | hydrolysis of E&L source compound (such as dodecamethylcyclhexasiloxane) |
| 6.50                         | Acetic acid                             | 64-19-7  | CONFIRMED                 | 17.7            | 8.5          | 9.2          | 9.4             | 9.6          | 12.1         | 10.9            | 9.5          | 14.9         | 11.3       | 3.1   | 1     | Flavorant                                                                |
| 6.60                         | 2-ethyl-1-hexanol                       | 104-76-7 | CONFIRMED                 | 0.9             | ND           | ND           | 0.9             | ND           | ND           | ND              | ND           | ND           | 0.9        | 0.0   | 3     | E&L                                                                      |
| 6.63                         | Menthone                                | 89-80-5  | CONFIRMED                 | 18.1            | 15.9         | 17.0         | 17.6            | 16.5         | 17.4         | 18.9            | 18.0         | 18.5         | 17.5       | 1.0   | 4     | oxidized menthol                                                         |
| 6.70                         | Menthofuran                             | 494-90-6 | CONFIRMED                 | 1.0             | ND           | ND           | 0.9             | 0.9          | ND           | 1.0             | 1.0          | 1.0          | 0.9        | 0.0   | 1     | Flavorant                                                                |



**Table S5 GC-MS Characterization of Aerosol Collected Under Non-Intense Puffing Regime from Three Batches of Menthol 3.0% at T=0**

| Library Retention Time (min) | Compound                                 | CAS #      | Identification Confidence | Batch HJ10PG06B |              |              | Batch HJ10PH06B |              |              | Batch HJ10PI06B |              |              | Avg (µg/g) | Stdev | Group | Rationalization               |
|------------------------------|------------------------------------------|------------|---------------------------|-----------------|--------------|--------------|-----------------|--------------|--------------|-----------------|--------------|--------------|------------|-------|-------|-------------------------------|
|                              |                                          |            |                           | Rep-1 (µg/g)    | Rep-2 (µg/g) | Rep-3 (µg/g) | Rep-1 (µg/g)    | Rep-2 (µg/g) | Rep-3 (µg/g) | Rep-1 (µg/g)    | Rep-2 (µg/g) | Rep-3 (µg/g) |            |       |       |                               |
| 6.79                         | Isomenthone                              | 491-07-6   | CONFIRMED                 | 5.8             | 5.1          | 5.4          | 5.5             | 5.3          | 5.5          | 6.0             | 5.6          | 5.8          | 5.5        | 0.3   | 1     | Flavorant                     |
| 7.07                         | 1,3Dioxolane-2methanol_2,4dimethyl-Iso1  | 53951-43-2 | MEDIUM                    | 2.7             | 2.2          | 2.2          | 2.5             | 2.3          | 2.6          | 1.9             | 1.7          | 1.9          | 2.2        | 0.3   | 4     | PG degradant                  |
| 7.20                         | 1,3Dioxolane-2methanol_2,4dimethyl-Iso2  | 53951-43-2 | MEDIUM                    | 1.4             | ND           | ND           | ND              | ND           | ND           | ND              | ND           | ND           | 1.4        | 0.0   | 4     | PG degradant                  |
| 7.20                         | Linalool                                 | 78-70-6    | CONFIRMED                 | 1.0             | ND           | ND           | 0.9             | ND           | 0.9          | 0.9             | 0.9          | 0.9          | 0.9        | 0.0   | 1     | Flavorant                     |
| 7.31                         | Linalyl acetate                          | 115-95-7   | CONFIRMED                 | 1.3             | 1.0          | 1.2          | 1.3             | 1.2          | 1.2          | 1.3             | 1.3          | 1.4          | 1.2        | 0.1   | 1     | Flavorant                     |
| 7.40                         | Menthyl acetate                          | 89-48-5    | CONFIRMED                 | 2.9             | 2.6          | 2.8          | 3.0             | 2.6          | 2.8          | 3.2             | 3.0          | 3.1          | 2.9        | 0.2   | 1     | Flavorant                     |
| 7.50                         | Unknown Menthol Related Comp.(RRT 0.503) | NA         | NA                        | 1.2             | 2.7          | 2.1          | 2.2             | 2.0          | 1.8          | 1.2             | 2.2          | 1.6          | 1.9        | 0.5   | 4     | Menthol (Flavorant) reaction  |
| 7.56                         | 1,3-Dioxolane-4-methanol_2,2-dimethyl-   | 100-79-8   | CONFIRMED                 | 13.0            | 9.3          | 10.7         | 11.5            | 11.9         | 11.6         | 7.6             | 6.1          | 7.2          | 9.9        | 2.4   | 4     | VG degradant                  |
| 7.68                         | Ethanone_1-(2-pyridinyl)-                | 1122-62-9  | CONFIRMED                 | 18.2            | 14.8         | 15.5         | 17.5            | 16.5         | 16.9         | 18.0            | 17.3         | 17.1         | 16.9       | 1.1   | 1     | Flavorant                     |
| 7.71                         | Unknown Menthol Related Comp.(RRT 0.523) | NA         | NA                        | 0.9             | 0.9          | 0.9          | 0.9             | 0.9          | 0.9          | 0.9             | 1.0          | 1.0          | 0.9        | 0.0   | 4     | Menthol (Flavorant) reaction  |
| 7.78                         | Terpinen-4-ol                            | 562-74-3   | CONFIRMED                 | 1.1             | 0.9          | ND           | 1.0             | ND           | 1.2          | 0.9             | 0.9          | ND           | 1.0        | 0.1   | 1     | Flavorant                     |
| 7.91                         | Acetylpyrazine                           | 22047-25-2 | CONFIRMED                 | 2.1             | ND           | 1.8          | 1.7             | ND           | 2.0          | 2.0             | ND           | ND           | 1.9        | 0.1   | 1     | Flavorant                     |
| 8.00                         | Methyl benzoate                          | 93-58-3    | CONFIRMED                 | 4.4             | 3.6          | ND           | 2.6             | 3.3          | ND           | 4.1             | 4.1          | 4.7          | 3.8        | 0.7   | 4     | benzoic acid + MeOH           |
| 8.24                         | Lavandulol                               | 498-16-8   | CONFIRMED                 | 2.3             | 2.1          | 2.1          | 2.4             | 2.1          | 2.3          | 2.2             | 2.5          | 2.6          | 2.3        | 0.2   | 1     | Flavorant                     |
| 8.20                         | 5-Methyl-2-(1-methylethyl)-Cyclohexanol  | 1490-04-6  | CONFIRMED                 | 4.6             | 3.8          | 3.8          | 4.1             | 3.6          | 4.5          | 4.8             | 4.4          | 3.4          | 4.1        | 0.5   | 1     | Isomer of menthol (Flavorant) |
| 8.21                         | Pulegone                                 | 89-82-7    | CONFIRMED                 | 1.7             | 1.6          | 1.8          | 2.0             | 1.8          | 1.8          | 2.0             | 2.0          | 1.7          | 1.8        | 0.1   | 1     | Flavorant                     |
| 8.31                         | Hexadecamethylcyclooctasiloxane          | 556-68-3   | CONFIRMED                 | 1.7             | 2.2          | 1.8          | 1.6             | 1.8          | 1.5          | 1.5             | 1.5          | 1.5          | 1.7        | 0.2   | 3     | E&L                           |
| 8.45                         | Diethoxydimethylsilane                   | 78-62-6    | CONFIRMED                 | 4.4             | 5.1          | 4.6          | 4.0             | 4.2          | 3.7          | 3.9             | 4.2          | 4.3          | 4.3        | 0.4   | 3     | E&L                           |
| 8.47                         | 1,3-Dioxolane_4-methyl-2-pentyl-         | 1599-49-1  | LOW                       | 2.9             | 2.5          | 2.5          | 2.9             | 2.5          | 2.6          | 2.0             | 1.9          | ND           | 2.5        | 0.4   | 4     | PG + hexanal                  |
| 8.47                         | Terpinyl propionate                      | 80-27-3    | MEDIUM                    | 0.9             | ND           | ND           | 1.0             | ND           | 0.9          | 1.0             | 0.9          | 0.9          | 0.9        | 0.1   | 1     | Flavorant                     |

**Table S5 GC-MS Characterization of Aerosol Collected Under Non-Intense Puffing Regime from Three Batches of Menthol 3.0% at T=0**

| Library Retention Time (min) | Compound                               | CAS #      | Identification Confidence | Batch HJ10PG06B |              |              | Batch HJ10PH06B |              |              | Batch HJ10PI06B |              |              | Avg (µg/g) | Stdev | Group | Rationalization                       |
|------------------------------|----------------------------------------|------------|---------------------------|-----------------|--------------|--------------|-----------------|--------------|--------------|-----------------|--------------|--------------|------------|-------|-------|---------------------------------------|
|                              |                                        |            |                           | Rep-1 (µg/g)    | Rep-2 (µg/g) | Rep-3 (µg/g) | Rep-1 (µg/g)    | Rep-2 (µg/g) | Rep-3 (µg/g) | Rep-1 (µg/g)    | Rep-2 (µg/g) | Rep-3 (µg/g) |            |       |       |                                       |
| 8.66                         | Nicotinealdehyde                       | 500-22-1   | CONFIRMED                 | 1.0             | 0.9          | ND           | 0.9             | 0.9          | 0.9          | 1.0             | 0.9          | ND           | 0.9        | 0.0   | 4     | demethylation of 3-acetylpyridine     |
| 9.36                         | Dipropylene glycol                     | 110-98-5   | CONFIRMED                 | 46.6            | 38.0         | 39.7         | 44.1            | 41.9         | 43.4         | 44.5            | 43.2         | 43.3         | 42.7       | 2.6   | 4     | 2PG - H2O                             |
| 9.46                         | Benzaldehyde_2,3-dimethyl-             | 5779-93-1  | MEDIUM                    | 1.6             | 1.2          | ND           | 1.2             | ND           | 1.4          | 1.5             | 1.5          | 1.4          | 1.4        | 0.2   | 3     | E&L                                   |
| 9.50                         | Benzyl alcohol                         | 100-51-6   | CONFIRMED                 | 40.0            | 33.6         | 35.0         | 39.6            | 36.9         | 38.3         | 39.0            | 38.4         | 38.2         | 37.7       | 2.1   | 1     | Flavorant                             |
| 9.52                         | N,2,3-trimethyl-2-isopropylbutamide    | 51115-67-4 | CONFIRMED                 | 78.3            | 65.7         | 68.4         | 74.7            | 70.5         | 74.2         | 76.4            | 74.6         | 74.7         | 73.1       | 4.0   | 1     | Flavorant                             |
| 9.61                         | (Z)-beta-damascone                     | 23726-92-3 | CONFIRMED                 | 13.7            | 11.6         | 12.3         | 13.2            | 12.3         | 14.3         | 14.2            | 13.6         | 13.5         | 13.2       | 0.9   | 1     | Flavorant                             |
| 9.95                         | 2-(4-methoxyphenyl)-1-pyrroline        | NA         | MEDIUM                    | 3.3             | 3.4          | 3.8          | 3.7             | 3.8          | 2.7          | 3.3             | 3.7          | 3.8          | 3.5        | 0.4   | 4     | Nicotine degradant                    |
| 10.53                        | N-methyl-4-(3-pyridyl)-3-buten-1-amine | 15585-43-0 | HIGH                      | 2.7             | 2.3          | 2.4          | 2.4             | 2.3          | 2.5          | 2.4             | 2.3          | 2.2          | 2.4        | 0.1   | 4     | Nicotine degradant                    |
| 10.55                        | N-Methylanabasine                      | 24380-92-5 | CONFIRMED                 | 2.0             | 1.7          | 1.7          | 1.9             | 1.8          | 1.9          | 1.9             | 1.9          | 1.8          | 1.8        | 0.1   | 4     | Nicotine degradant                    |
| 10.55                        | Phenol                                 | 108-95-2   | CONFIRMED                 | 1.4             | 1.1          | 1.1          | 1.2             | 1.2          | 1.2          | 1.5             | 1.4          | 1.5          | 1.3        | 0.2   | 2     | HPHC                                  |
| 11.20                        | Dihydroxyacetone                       | 96-26-4    | CONFIRMED                 | 1.3             | 1.2          | 1.1          | 1.4             | 1.1          | 1.2          | 1.2             | 1.2          | ND           | 1.2        | 0.1   | 4     | Oxidation of glycerol                 |
| 12.30                        | Piperonal                              | 120-57-0   | CONFIRMED                 | 2.4             | 2.0          | 2.1          | 2.4             | 2.4          | 2.4          | 2.5             | 2.4          | 2.4          | 2.3        | 0.2   | 1     | Flavorant                             |
| 12.35                        | Glyceryl monoacetate                   | 106-61-6   | CONFIRMED                 | 15.8            | 11.8         | 14.2         | 14.1            | 15.4         | 14.3         | 14.2            | 14.9         | 14.9         | 14.4       | 1.1   | 4     | VG esterification/transesterification |
| 12.70                        | 3-(1,3-dimethylpyrrol-2-yl)pyridine    | 78210-38-5 | CONFIRMED                 | 2.8             | 2.9          | 2.5          | 2.6             | 2.3          | 2.6          | 2.5             | 2.0          | 1.9          | 2.5        | 0.3   | 4     | Nicotine degradant                    |
| 13.57                        | Unknown Nic. Related Comp.(RRT 0.849)  | NA         | NA                        | 3.7             | 4.3          | 2.8          | 7.2             | 2.9          | ND           | 3.3             | 3.4          | 5.2          | 4.1        | 1.5   | 4     | Nicotine degradant                    |
| 13.81                        | Unknown Nic.Related Comp.(RRT 0.923)A  | NA         | NA                        | 1.4             | 1.3          | 1.4          | 1.3             | 1.5          | 1.0          | 0.9             | 1.3          | 1.3          | 1.3        | 0.2   | 4     | Nicotine degradant                    |
| 14.31                        | 1,3-Ethoxyethylideneglycerol           | NA         | MEDIUM                    | 5.5             | 3.9          | 3.9          | 4.9             | 4.1          | 1.6          | 4.0             | 4.7          | 4.2          | 4.1        | 1.1   | 4     | VG degradant                          |
| 14.53                        | p-Dioxane-2,5-dimethanol               | 14236-12-5 | CONFIRMED                 | 14.0            | 11.7         | 12.6         | 13.7            | 13.2         | 13.7         | 14.3            | 13.6         | 13.7         | 13.4       | 0.8   | 4     | 2VG dehydration                       |
| 14.60                        | Unknown Nic.Related Comp.(RRT 0.970)   | NA         | NA                        | 5.8             | 3.1          | 4.0          | 4.2             | 4.4          | 4.8          | 4.2             | 4.9          | 4.5          | 4.4        | 0.7   | 4     | Nicotine degradant                    |
| 14.66                        | N-Propylnormicotine                    | 91907-45-8 | CONFIRMED                 | 1.3             | ND           | ND           | ND              | 1.2          | 1.1          | 1.3             | ND           | ND           | 1.2        | 0.1   | 4     | Nicotine degradant                    |

**Table S5 GC-MS Characterization of Aerosol Collected Under Non-Intense Puffing Regime from Three Batches of Menthol 3.0% at T=0**

| Library Retention Time (min) | Compound                                           | CAS #         | Identification Confidence | Batch HJ10PG06B |              |              | Batch HJ10PH06B |              |              | Batch HJ10PI06B |              |              | Avg (µg/g) | Stdev | Group | Rationalization    |
|------------------------------|----------------------------------------------------|---------------|---------------------------|-----------------|--------------|--------------|-----------------|--------------|--------------|-----------------|--------------|--------------|------------|-------|-------|--------------------|
|                              |                                                    |               |                           | Rep-1 (µg/g)    | Rep-2 (µg/g) | Rep-3 (µg/g) | Rep-1 (µg/g)    | Rep-2 (µg/g) | Rep-3 (µg/g) | Rep-1 (µg/g)    | Rep-2 (µg/g) | Rep-3 (µg/g) |            |       |       |                    |
| 14.70                        | Bis(2,6-hydroxymethyl) dioxane                     | 54120-69-3    | CONFIRMED                 | 53.4            | 44.0         | 46.5         | 50.7            | 48.5         | 51.3         | 52.8            | 51.9         | 50.2         | 49.9       | 3.1   | 4     | 2VG dehydration    |
| 14.72                        | Bis(2,6 hydroxymethyl) dioxane - Iso2              | 54120-69-3    | HIGH                      | 39.4            | 28.3         | ND           | 36.8            | ND           | 48.7         | 38.2            | 42.4         | 33.8         | 38.2       | 6.4   | 4     | 2VG dehydration    |
| 14.89                        | Bis(2,6-hydroxymethyl) dioxane - Iso3              | 54120-69-3    | HIGH                      | 29.6            | 24.0         | 21.6         | 24.7            | 24.8         | 23.0         | 26.2            | 29.4         | 26.9         | 25.6       | 2.7   | 4     | 2VG dehydration    |
| 15.00                        | Bis(2,6-hydroxymethyl) dioxane - Iso4              | 54120-69-3    | HIGH                      | 31.6            | 25.1         | 27.5         | 29.0            | 27.8         | 26.7         | 29.9            | 29.5         | 28.5         | 28.4       | 1.9   | 4     | 2VG dehydration    |
| 15.19                        | Unknown Nic.Related Comp.(RRT 1.012)               | NA            | NA                        | 3.5             | 4.8          | 3.5          | 6.5             | 2.6          | 5.0          | 5.0             | 3.4          | 4.3          | 4.3        | 1.2   | 4     | Nicotine degradant |
| 15.20                        | Bis(2,6-hydroxymethyl) dioxane - Iso5              | 54120-69-3    | HIGH                      | 12.0            | 10.0         | 11.5         | 11.6            | 11.1         | 11.8         | 12.0            | 12.4         | 11.7         | 11.5       | 0.7   | 4     | 2VG dehydration    |
| 16.80                        | Hexadecanoic Acid                                  | 57-10-3       | CONFIRMED                 | 21.7            | 10.0         | 14.3         | 15.0            | 10.2         | 10.0         | 7.7             | 8.2          | 6.3          | 11.5       | 4.8   | 3     | E&L                |
| 17.00                        | 2-(beta nicotyrine)acetaldehyde Iso-1 <sup>a</sup> | NA            | MEDIUM                    | ND              | 0.9          | ND           | 1.1             | ND           | 1.5          | 1.3             | ND           | ND           | 1.2        | 0.3   | 4     | Nicotine degradant |
| 17.50                        | 1-(beta nicotyrine)propan-2-one Iso-1 <sup>a</sup> | 24162-42-88-9 | HIGH                      | 5.6             | 5.6          | 5.4          | 6.2             | 5.7          | 6.7          | 5.4             | 5.2          | 4.8          | 5.6        | 0.5   | 4     | Nicotine degradant |
| 18.56                        | 2-(beta nicotyrine)acetaldehyde Iso-2 <sup>a</sup> | NA            | MEDIUM                    | 1.2             | 1.0          | 1.3          | 1.7             | 1.4          | 2.0          | 2.0             | 1.3          | 1.2          | 1.5        | 0.4   | 4     | Nicotine degradant |
| 19.08                        | Caffeine                                           | 58-08-2       | CONFIRMED                 | 15.5            | 12.4         | 13.3         | 14.4            | 14.0         | 14.2         | 15.1            | 15.0         | 14.5         | 14.2       | 1.0   | 1     | Flavorant          |
| 19.80                        | 1-(beta nicotyrine)propan-2-one Iso-2 <sup>b</sup> | 24162-42-88-9 | HIGH                      | 12.8            | 12.8         | 12.9         | 15.1            | 14.5         | 16.4         | 12.6            | 13.1         | 12.0         | 13.6       | 1.4   | 4     | Nicotine degradant |
| 22.53                        | Unknown Long Chain Alkane (RRT 1.482)              | NA            | NA                        | ND              | 17.0         | ND           | ND              | ND           | ND           | ND              | ND           | ND           | 17.0       | 0.0   | 5     | NR                 |

<sup>a</sup> 1-(beta nicotyrine)propan-2-one: 1-(1-methyl-5-(pyridine-3-yl)-1H-pyrrol-2-yl)propan-2-one

<sup>a</sup> 2-(beta nicotyrine)acetaldehyde: 2-(1-methyl-5-(pyridine-3-yl)-1H-pyrrol-2-yl)acetaldehyde

**Table S6 LC-HRMS Characterization of Aerosol Collected Under Intense Puffing Regime from Three Batches of Menthol 3.0% at T=0**

| RT<br>[min] | RRT  | Name                                                                          | CAS #            | Confidence<br>Level | Estimated Amount µg/g |       |       |                 |       |       |                 |       |       | Avg<br>(µg/g) | Stdev | P-Value | Group | Rationalization                                                       |
|-------------|------|-------------------------------------------------------------------------------|------------------|---------------------|-----------------------|-------|-------|-----------------|-------|-------|-----------------|-------|-------|---------------|-------|---------|-------|-----------------------------------------------------------------------|
|             |      |                                                                               |                  |                     | Batch HJ10PG06B       |       |       | Batch HJ10PH06B |       |       | Batch HJ10PI06B |       |       |               |       |         |       |                                                                       |
|             |      |                                                                               |                  |                     | Rep 1                 | Rep 2 | Rep 3 | Rep 1           | Rep 2 | Rep 3 | Rep 1           | Rep 2 | Rep 3 |               |       |         |       |                                                                       |
| 2.07        | 0.15 | unknown PG_VG<br>related compound RRT<br>0.16 <sup>a</sup>                    | NA               | NA                  | 7.8                   | 6.0   | 8.5   | 9.3             | 8.7   | 7.5   | 7.5             | 9.1   | 9.9   | 8.3           | 1.2   | 1.2E-13 | 4     | dehydration of<br>PG VG to<br>form conjugate                          |
| 2.40        | 0.17 | hydroxyacetone                                                                | 116-09-6         | high                | 10.5                  | 11.4  | 11.5  | 12.8            | 11.8  | 9.9   | 11.9            | 11.9  | 12.6  | 11.6          | 0.9   | 3.6E-15 | 4     | dehydration of<br>glycerol and/or<br>oxidation of<br>PG               |
| 2.84        | 0.21 | 4-<br>methoxybenzaldehyde                                                     | 123-11-5         | high                | 3.5                   | 3.6   | 3.9   | 4.1             | 4.1   | 3.5   | 4.4             | 4.3   | 4.8   | 4.0           | 0.4   | 2.8E-15 | 4     | methoxylated<br>benzaldehyde                                          |
| 3.25        | 0.24 | unknown nicotine<br>related compound RRT<br>0.24                              | NA               | NA                  | 36.3                  | 31.7  | 32.0  | 37.3            | 37.6  | 45.5  | 37.4            | 32.3  | 36.3  | 36.3          | 4.2   | 3.0E-04 | 4     | nicotine<br>degradant                                                 |
| 4.43        | 0.32 | theobromine                                                                   | 83-67-0          | high                | ND                    | 1.9   | 2.8   | 3.2             | 3.0   | 2.7   | 3.3             | 3.2   | 3.4   | 2.9           | 0.5   | NA      | 1     | Flavorant                                                             |
| 7.21        | 0.52 | caffeine                                                                      | 58-08-2          | confirmed           | 5.3                   | 5.6   | 5.5   | 6.3             | 6.1   | 5.5   | 6.0             | 5.7   | 6.3   | 5.8           | 0.4   | NA      | 1     | Flavorant                                                             |
| 10.24       | 0.74 | 2,3-dihydroxypropyl<br>benzoate                                               | 3376-59-8        | high                | 28.9                  | 36.9  | 39.7  | 58.3            | 35.0  | 33.8  | 42.3            | 52.2  | 34.7  | 40.2          | 9.4   | 1.5E-12 | 4     | benzoic acid +<br>VG                                                  |
| 11.58       | 0.84 | N-methylmyosmine                                                              | 525-74-6         | high                | 18.2                  | 28.8  | 27.8  | 31.7            | 18.3  | 28.0  | 19.4            | 27.4  | 35.0  | 26.1          | 6.1   | 5.9E-06 | 4     | nicotine<br>degradant                                                 |
| 11.78       | 0.85 | 1-(1-methyl-5-<br>(pyridin-3-yl)-1H-<br>pyrrol-2-yl)propan-2-<br>one isomer 1 | 2416242-<br>88-9 | high                | 7.3                   | 6.2   | 7.0   | 6.7             | 7.3   | 6.4   | 7.4             | 7.6   | 7.2   | 7.0           | 0.5   | 5.5E-17 | 4     | nicotine<br>degradant                                                 |
| 12.43       | 0.90 | 1-(1-methyl-5-<br>(pyridin-3-yl)-1H-<br>pyrrol-2-yl)propan-2-<br>one isomer 2 | 2416242-<br>88-9 | high                | 10.6                  | 9.2   | 10.4  | 9.7             | 10.3  | 9.1   | 10.6            | 11.3  | 10.5  | 10.2          | 0.7   | 1.5E-17 | 4     | nicotine<br>degradant                                                 |
| 13.42       | 0.97 | unknown benzyl<br>alcohol related<br>compound RRT 0.97                        | NA               | NA                  | 13.6                  | 15.2  | 14.9  | 16.4            | 15.4  | 12.8  | 15.5            | 15.3  | 16.5  | 15.1          | 1.2   | 2.1E-16 | 4     | methoxylated,<br>oxidized and<br>ring opening<br>of benzyl<br>alcohol |
| 16.26       | 1.18 | 2-isopropyl-N, 2, 3-<br>trimethylbutylbutamide                                | 51115-67-4       | high                | 79.6                  | 90.2  | 88.7  | 93.8            | 87.4  | 74.1  | 89.1            | 90.8  | 99.2  | 88.1          | 7.4   | 7.4E-17 | 1     | flavorant                                                             |
| 17.75       | 1.28 | unknown neryl acetate<br>related compound RRT<br>1.30                         | NA               | NA                  | 17.7                  | 13.0  | 13.0  | 17.5            | 16.5  | 15.1  | 9.1             | 13.4  | 16.8  | 14.7          | 2.8   | 9.8E-03 | 4     | demethylated<br>and oxidized<br>neryl acetate                         |
| 20.68       | 1.50 | (Z)-beta-damascone                                                            | 23726-92-3       | high                | 27.5                  | 9.0   | 27.2  | 28.8            | 30.7  | 28.9  | 29.5            | 8.8   | 10.0  | 22.3          | 9.8   | 8.2E-04 | 1     | flavorant                                                             |

**Table S7 LC-HRMS Characterization of Aerosol Collected Under Non-Intense Puffing Regime from Three Batches of Menthol 3.0% at T=0**

| RT<br>[min] | RRT  | Name                                                                          | CAS #            | Confidence<br>Level | Estimated Amount µg/g |          |          |                 |          |          |                 |          |          | Avg<br>(µg/g) | Stdev | P-<br>Value | Group | Rationalization                                                 |
|-------------|------|-------------------------------------------------------------------------------|------------------|---------------------|-----------------------|----------|----------|-----------------|----------|----------|-----------------|----------|----------|---------------|-------|-------------|-------|-----------------------------------------------------------------|
|             |      |                                                                               |                  |                     | Batch HJ10PG06B       |          |          | Batch HJ10PH06B |          |          | Batch HJ10PI06B |          |          |               |       |             |       |                                                                 |
|             |      |                                                                               |                  |                     | Rep<br>1              | Rep<br>2 | Rep<br>3 | Rep<br>1        | Rep<br>2 | Rep<br>3 | Rep<br>1        | Rep<br>2 | Rep<br>3 |               |       |             |       |                                                                 |
| 2.07        | 0.15 | unknown PG_VG<br>related compound RRT<br>0.16 <sup>a</sup>                    | NA               | NA                  | 11.1                  | 7.1      | 8.7      | 9.3             | 10.8     | 10.3     | 9.8             | 9.7      | 8.2      | 9.4           | 1.3   | 8.3E-<br>15 | 4     | dehydration of PG VG<br>to form conjugate                       |
| 2.41        | 0.17 | hydroxyacetone                                                                | 116-09-<br>6     | high                | 13.8                  | 11.3     | 12.8     | 13.7            | 13.5     | 13.3     | 14.1            | 14.8     | 14.6     | 13.6          | 1.0   | 8.9E-<br>15 | 4     | dehydration of glycerol<br>and/or oxidation of PG               |
| 3.27        | 0.24 | unknown nicotine<br>related compound RRT<br>0.24                              | NA               | NA                  | 36.0                  | 32.5     | 31.7     | 33.7            | 33.2     | 33.8     | 34.4            | 36.0     | 33.4     | 33.9          | 1.4   | 5.1E-<br>02 | 4     | nicotine degradant                                              |
| 4.23        | 0.31 | theobromine                                                                   | 83-67-0          | high                | 3.9                   | 3.2      | 3.6      | 3.8             | 3.7      | 3.7      | 4.0             | 4.2      | 4.1      | 3.8           | 0.3   | NA          | 1     | Flavorant                                                       |
| 7.22        | 0.52 | caffeine                                                                      | 58-08-2          | confirmed           | 6.4                   | 5.1      | 5.0      | 5.9             | 5.7      | 5.5      | 5.9             | 6.0      | 5.9      | 5.7           | 0.4   | 1.8E-<br>04 | 1     | Flavorant                                                       |
| 10.25       | 0.74 | 2,3-dihydroxypropyl<br>benzoate                                               | 3376-<br>59-8    | high                | 34.7                  | 27.8     | 28.8     | 30.0            | 34.8     | 31.6     | 28.9            | 36.2     | 35.7     | 32.0          | 3.3   | 1.5E-<br>14 | 4     | benzoic acid + VG                                               |
| 11.57       | 0.84 | N-methylmyosmine                                                              | 525-74-<br>6     | high                | 32.1                  | 28.8     | 28.7     | 29.6            | 30.9     | 29.9     | 18.2            | 33.9     | 28.8     | 29.0          | 4.4   | 9.0E-<br>04 | 4     | nicotine degradant                                              |
| 11.78       | 0.85 | 1-(1-methyl-5-<br>(pyridin-3-yl)-1H-<br>pyrrol-2-yl)propan-2-<br>one isomer 1 | 241624<br>2-88-9 | high                | 6.9                   | 6.9      | 6.8      | 8.0             | 7.6      | 8.5      | 6.4             | 6.8      | 6.2      | 7.1           | 0.8   | 6.2E-<br>15 | 4     | nicotine degradant                                              |
| 12.44       | 0.90 | 1-(1-methyl-5-<br>(pyridin-3-yl)-1H-<br>pyrrol-2-yl)propan-2-<br>one isomer 2 | 241624<br>2-88-9 | high                | 10.5                  | 10.3     | 11.3     | 12.6            | 12.2     | 14.0     | 10.5            | 11.6     | 10.5     | 11.5          | 1.2   | 9.6E-<br>16 | 4     | nicotine degradant                                              |
| 13.43       | 0.97 | unknown benzyl<br>alcohol related<br>compound RRT 0.97                        | NA               | NA                  | 16.2                  | 12.9     | 14.1     | 15.4            | 15.0     | 14.9     | 15.7            | 16.4     | 15.4     | 15.1          | 1.1   | 3.0E-<br>15 | 4     | methoxylated, oxidized<br>and ring opening of<br>benzyl alcohol |
| 16.27       | 1.18 | 2-isopropyl-N, 2, 3-<br>trimethylbutylbutamide                                | 51115-<br>67-4   | high                | 97.4                  | 78.5     | 86.9     | 92.4            | 88.7     | 93.1     | 93.7            | 97.5     | 94.5     | 91.4          | 6.0   | 1.5E-<br>14 | 1     | Flavorant                                                       |
| 17.96       | 1.30 | unknown neryl acetate<br>related compound RRT<br>1.30                         | NA               | NA                  | 48.3                  | 39.9     | 50.1     | 52.3            | 54.5     | 53.1     | 55.3            | 55.7     | 52.2     | 51.3          | 4.9   | 1.5E-<br>05 | 4     | demethylated and<br>oxidized neryl acetate                      |
| 20.69       | 1.50 | (Z)-beta-damascone                                                            | 23726-<br>92-3   | high                | 31.7                  | 35.9     | 25.4     | 33.3            | 31.6     | 31.0     | 30.5            | 32.8     | 7.5      | 28.8          | 8.5   | 5.9E-<br>02 | 1     | Flavorant                                                       |

**Table S8 GC-MS Characterization of Aerosol Collected Under Intense Puffing Regime from Three Batches of Menthol 5.0% at T=0**

| Library Retention Time (min) | Compound                                 | CAS#       | Identification Confidence | Batch HH26PG06A |              |              | Batch HH26PH06A |              |              | Batch HH26PI06A |              |              | Avg (µg/g) | Stdev | Group | Rationalization                                                           |
|------------------------------|------------------------------------------|------------|---------------------------|-----------------|--------------|--------------|-----------------|--------------|--------------|-----------------|--------------|--------------|------------|-------|-------|---------------------------------------------------------------------------|
|                              |                                          |            |                           | Rep-1 (µg/g)    | Rep-2 (µg/g) | Rep-3 (µg/g) | Rep-1 (µg/g)    | Rep-2 (µg/g) | Rep-3 (µg/g) | Rep-1 (µg/g)    | Rep-2 (µg/g) | Rep-3 (µg/g) |            |       |       |                                                                           |
| 3.62                         | Decamethylcyclopentasiloxane Isomer 2    | 541-02-6   | CONFIRMED                 | 4.1             | 6.7          | 9.1          | 8.5             | 12.2         | 9.9          | 10.2            | 11.5         | 12.8         | 9.4        | 2.8   | 3     | E&L                                                                       |
| 3.92                         | Unknown (RRT 0.262)                      | NA         | NA                        | 3.5             | 3.4          | 3.6          | 3.2             | 3.0          | 2.7          | 3.2             | 3.3          | 2.7          | 3.2        | 0.3   | 5     | NR                                                                        |
| 4.08                         | Pyridine                                 | 110-86-1   | CONFIRMED                 | 0.9             | 1.0          | 1.8          | 1.6             | 1.2          | 1.0          | 0.9             | 1.6          | 1.0          | 1.2        | 0.3   | 1     | Flavorant                                                                 |
| 5.04                         | Hydroxyacetone                           | 116-09-6   | CONFIRMED                 | 8.6             | 9.8          | 12.6         | 9.3             | 8.4          | 8.4          | 9.0             | 12.1         | 9.6          | 9.8        | 1.5   | 4     | dehydration of glycerol and/or oxidation of PG                            |
| 5.61                         | 1-((ethoxydimethylsilyl)oxy)propan-2-ol  | NA         | MEDIUM                    | 3.3             | 3.5          | 4.0          | 3.5             | 3.7          | 3.5          | 3.4             | 3.7          | 3.6          | 3.6        | 0.2   | 4     | hydrolysis of E&L source compound (such as dodecamethylcyclohexasiloxane) |
| 5.94                         | 2-((ethoxydimethylsilyl)oxy)propan-1-ol  | NA         | MEDIUM                    | 1.7             | 1.7          | 2.1          | 1.8             | 1.8          | 1.9          | 1.6             | 1.8          | 1.7          | 1.8        | 0.1   | 4     | hydrolysis of E&L source compound (such as dodecamethylcyclohexasiloxane) |
| 6.50                         | Acetic acid                              | 64-19-7    | CONFIRMED                 | 8.6             | 16.0         | 12.4         | 9.8             | 8.7          | 10.1         | 10.7            | 9.8          | 9.1          | 10.6       | 2.3   | 1     | Flavorant                                                                 |
| 6.63                         | Menthone                                 | 89-80-5    | CONFIRMED                 | 15.5            | 17.2         | 17.9         | 17.7            | 15.4         | 16.9         | 16.6            | 18.5         | 16.9         | 16.9       | 1.0   | 4     | oxidized menthol                                                          |
| 6.70                         | Menthofuran                              | 494-90-6   | CONFIRMED                 | 0.9             | 0.9          | 0.9          | 1.0             | 0.8          | 0.9          | 1.0             | 1.0          | 1.0          | 0.9        | 0.1   | 1     | Flavorant                                                                 |
| 6.79                         | Isomenthone                              | 491-07-6   | CONFIRMED                 | 5.8             | 6.4          | 6.7          | 6.6             | 5.8          | 6.3          | 6.1             | 6.9          | 6.4          | 6.3        | 0.4   | 1     | Flavorant                                                                 |
| 7.07                         | 1,3Dioxolane-2methanol_2,4dimethyl-Iso1  | 53951-43-2 | MEDIUM                    | 3.0             | 3.7          | 3.2          | 6.5             | 5.9          | 6.5          | 5.8             | 6.3          | 6.0          | 5.2        | 1.5   | 4     | PG degradant                                                              |
| 7.20                         | 1,3Dioxolane-2methanol_2,4dimethyl-Iso2  | 53951-43-2 | MEDIUM                    | 1.3             | 1.7          | 1.5          | 3.3             | 3.1          | 3.6          | 2.8             | 3.1          | 2.9          | 2.6        | 0.9   | 4     | PG degradant                                                              |
| 7.20                         | Linalool                                 | 78-70-6    | CONFIRMED                 | 0.9             | 0.9          | 0.9          | 0.9             | 0.9          | 0.9          | 0.9             | 1.1          | 0.9          | 0.9        | 0.1   | 1     | Flavorant                                                                 |
| 7.31                         | Linalyl acetate                          | 115-95-7   | CONFIRMED                 | 1.1             | 1.2          | 1.3          | 1.3             | 1.1          | 1.2          | 1.4             | 1.5          | 1.3          | 1.3        | 0.1   | 1     | Flavorant                                                                 |
| 7.40                         | Menthyl acetate                          | 89-48-5    | CONFIRMED                 | 3.3             | 3.8          | 3.9          | 3.4             | 2.9          | 3.2          | 3.0             | 3.4          | 3.2          | 3.3        | 0.3   | 1     | Flavorant                                                                 |
| 7.42                         | Isopulegol                               | 89-79-2    | CONFIRMED                 | 2.3             | 2.7          | 2.7          | 2.6             | 2.4          | 2.5          | 2.6             | 2.8          | 2.6          | 2.6        | 0.2   | 4     | reduction of isopulegone                                                  |
| 7.50                         | Unknown Menthol Related Comp.(RRT 0.503) | NA         | NA                        | 2.8             | 2.2          | 2.4          | 1.3             | 1.5          | 2.0          | 2.3             | 2.3          | 2.3          | 2.1        | 0.5   | 4     | Menthol (Flavorant) reaction                                              |
| 7.56                         | 1,3-Dioxolane-4-methanol_2,2-dimethyl-   | 100-79-8   | CONFIRMED                 | 12.1            | 12.0         | 10.4         | 70.1            | 57.8         | 75.4         | 68.2            | 25.5         | 23.5         | 39.5       | 27.8  | 4     | VG degradant                                                              |
| 7.68                         | Ethanone_1-(2-pyridinyl)-                | 1122-62-9  | CONFIRMED                 | 16.2            | 18.5         | 18.2         | 15.9            | 13.9         | 15.7         | 16.7            | 18.7         | 17.0         | 16.7       | 1.5   | 1     | Flavorant                                                                 |
| 7.64                         | Unknown Siloxane (RRT 0.515)             | NA         | NA                        | 0.8             | 1.1          | 1.1          | 1.0             | 0.9          | 1.1          | 0.9             | 1.0          | 1.0          | 1.0        | 0.1   | 3     | E&L                                                                       |
| 7.78                         | Terpinen-4-ol                            | 562-74-3   | CONFIRMED                 | 0.7             | ND           | 1.0          | 0.8             | ND           | 0.8          | 1.0             | ND           | 0.8          | 0.9        | 0.1   | 1     | Flavorant                                                                 |

**Table S8 GC-MS Characterization of Aerosol Collected Under Intense Puffing Regime from Three Batches of Menthol 5.0% at T=0**

| Library Retention Time (min) | Compound                                | CAS#        | Identification Confidence | Batch HH26PG06A |              |              | Batch HH26PH06A |              |              | Batch HH26PI06A |              |              | Avg (µg/g) | Stdev | Group | Rationalization                   |
|------------------------------|-----------------------------------------|-------------|---------------------------|-----------------|--------------|--------------|-----------------|--------------|--------------|-----------------|--------------|--------------|------------|-------|-------|-----------------------------------|
|                              |                                         |             |                           | Rep-1 (µg/g)    | Rep-2 (µg/g) | Rep-3 (µg/g) | Rep-1 (µg/g)    | Rep-2 (µg/g) | Rep-3 (µg/g) | Rep-1 (µg/g)    | Rep-2 (µg/g) | Rep-3 (µg/g) |            |       |       |                                   |
| 7.91                         | Acetylpyrazine                          | 22047-25-2  | CONFIRMED                 | ND              | 2.3          | 2.0          | 2.0             | 1.8          | 2.0          | 1.8             | 2.0          | 1.9          | 2.0        | 0.2   | 1     | Flavorant                         |
| 7.97                         | Unknown Siloxane (RRT 0.532)            | NA          | NA                        | ND              | ND           | 0.7          | ND              | ND           | ND           | ND              | 0.8          | ND           | 0.7        | 0.0   | 3     | E&L                               |
| 8.00                         | Methyl benzoate                         | 93-58-3     | CONFIRMED                 | 8.7             | 6.7          | 12.5         | 8.1             | 6.4          | 5.5          | 6.2             | 12.1         | 7.1          | 8.1        | 2.5   | 4     | benzoic acid + MeOH               |
| 8.09                         | Unknown Siloxane (RRT 0.540)            | NA          | NA                        | ND              | 1.6          | ND           | ND              | ND           | ND           | ND              | ND           | ND           | 1.6        | 0.0   | 3     | E&L                               |
| 8.12                         | Unknown Siloxane (RRT 0.542)            | NA          | NA                        | 0.8             | 0.8          | ND           | 1.0             | 1.3          | 1.1          | ND              | 2.3          | 0.9          | 1.2        | 0.5   | 3     | E&L                               |
| 8.24                         | Lavandulol                              | 498-16-8    | CONFIRMED                 | 1.7             | 2.0          | 1.7          | 1.8             | 1.6          | 1.7          | 1.7             | ND           | 2.0          | 1.8        | 0.2   | 1     | Flavorant                         |
| 8.20                         | 5-Methyl-2-(1-methylethyl)-Cyclohexanol | 1490-04-6   | CONFIRMED                 | 3.79            | 5.02         | 4.73         | 4.12            | 3.86         | 3.96         | 4.33            | 5.05         | 4.86         | 4.4        | 0.5   | 1     | Isomer of menthol (Flavorant)     |
| 8.20                         | Acetophenone                            | 98-86-2     | CONFIRMED                 | ND              | ND           | 1.0          | ND              | ND           | ND           | ND              | 1.1          | 1.0          | 1.1        | 0.1   | 5     | NR                                |
| 8.21                         | Pulegone                                | 89-82-7     | CONFIRMED                 | 1.8             | 1.9          | 2.1          | 1.9             | 1.7          | 1.8          | 1.9             | 2.0          | 1.9          | 1.9        | 0.1   | 1     | Flavorant                         |
| 8.45                         | Diethoxydimethylsilane                  | 78-62-6     | CONFIRMED                 | 16.2            | 15.0         | 17.7         | 17.1            | 18.6         | 20.0         | 16.8            | 17.5         | 17.8         | 17.4       | 1.4   | 3     | E&L                               |
| 8.47                         | 1,3-Dioxolane_4-methyl-2-pentyl-        | 1599-49-1   | LOW                       | 2.5             | 2.7          | 2.9          | 7.4             | 6.4          | 7.1          | 6.3             | 7.0          | 6.7          | 5.5        | 2.1   | 4     | PG + hexanal                      |
| 8.47                         | Terpinyl propionate                     | 80-27-3     | MEDIUM                    | ND              | 0.8          | 0.8          | 0.8             | ND           | 0.7          | 0.8             | 0.9          | 0.7          | 0.8        | 0.1   | 1     | Flavorant                         |
| 8.66                         | Nicotinealdehyde                        | 500-22-1    | CONFIRMED                 | 1.5             | 1.5          | 1.7          | 1.5             | 1.4          | 1.5          | 1.5             | 1.7          | 1.6          | 1.5        | 0.1   | 4     | demethylation of 3-acetylpyridine |
| 8.80                         | Piperitone                              | 89-81-6     | CONFIRMED                 | ND              | 0.8          | ND           | ND              | ND           | ND           | ND              | 0.7          | ND           | 0.7        | 0.0   | 1     | Flavorant                         |
| 9.36                         | Dipropylene glycol                      | 110-98-5    | CONFIRMED                 | 40.9            | 48.0         | 45.3         | 44.7            | 40.4         | 43.2         | 43.7            | 48.4         | 44.3         | 44.3       | 2.7   | 4     | PG degradant                      |
| 9.46                         | Benzaldehyde_2,3-dimethyl-              | 5779-93-1   | MEDIUM                    | 1.0             | 1.5          | 1.8          | ND              | 1.1          | ND           | 1.5             | 1.8          | 1.5          | 1.5        | 0.3   | 3     | E&L                               |
| 9.50                         | Benzyl alcohol                          | 100-51-6    | CONFIRMED                 | 35.7            | 43.3         | 39.9         | 39.7            | 35.8         | 39.3         | 40.9            | 44.3         | 41.2         | 40.0       | 2.9   | 1     | Flavorant                         |
| 9.52                         | N,2,3-trimethyl-2-isopropylbutamide     | 51115-67-4  | CONFIRMED                 | 68.6            | 81.3         | 75.6         | 73.8            | 66.3         | 72.2         | 73.9            | 80.2         | 73.8         | 74.0       | 4.8   | 1     | Flavorant                         |
| 9.61                         | (Z)-beta-Damascone                      | 23726-92-3* | CONFIRMED                 | 13.1            | 15.0         | 15.1         | 16.0            | 12.8         | 13.9         | 14.7            | 15.3         | 14.5         | 14.5       | 1.1   | 1     | Flavorant                         |
| 9.95                         | 2-(4-methoxyphenyl)-1-pyrroline         | NA          | MEDIUM                    | 4.4             | 4.1          | 4.8          | 4.2             | 4.6          | 4.7          | 4.3             | 5.4          | 5.3          | 4.6        | 0.5   | 4     | Nicotine degradant                |
| 10.11                        | Unknown Nic.Related Comp.(RRT 0.670)    | NA          | NA                        | 0.7             | 1.1          | 0.9          | 0.8             | 0.9          | 1.3          | 0.9             | 1.0          | 0.9          | 0.9        | 0.2   | 4     | Nicotine degradant                |
| 10.53                        | N-methyl-4-(3-pyridyl)-3-buten-1-amine  | 15585-43-0  | HIGH                      | 4.1             | 5.2          | 4.7          | 4.8             | 4.0          | 4.6          | 5.1             | 5.7          | 5.1          | 4.8        | 0.5   | 4     | Nicotine degradant                |

**Table S8 GC-MS Characterization of Aerosol Collected Under Intense Puffing Regime from Three Batches of Menthol 5.0% at T=0**

| Library Retention Time (min) | Compound                                | CAS#       | Identification Confidence | Batch HH26PG06A |              |              | Batch HH26PH06A |              |              | Batch HH26PI06A |              |              | Avg (µg/g) | Stdev | Group | Rationalization                       |
|------------------------------|-----------------------------------------|------------|---------------------------|-----------------|--------------|--------------|-----------------|--------------|--------------|-----------------|--------------|--------------|------------|-------|-------|---------------------------------------|
|                              |                                         |            |                           | Rep-1 (µg/g)    | Rep-2 (µg/g) | Rep-3 (µg/g) | Rep-1 (µg/g)    | Rep-2 (µg/g) | Rep-3 (µg/g) | Rep-1 (µg/g)    | Rep-2 (µg/g) | Rep-3 (µg/g) |            |       |       |                                       |
| 10.55                        | N-Methylanabasine                       | 24380-92-5 | CONFIRMED                 | 2.8             | 3.1          | 3.2          | 3.0             | 2.9          | 2.9          | 3.2             | 3.6          | 3.2          | 3.1        | 0.2   | 4     | Nicotine degradant                    |
| 10.55                        | Phenol                                  | 108-95-2   | CONFIRMED                 | 2.0             | 2.1          | 2.2          | 1.8             | 1.9          | 1.6          | 1.8             | 2.3          | 1.7          | 1.9        | 0.2   | 2     | HPHC                                  |
| 11.20                        | Dihydroxyacetone                        | 96-26-4    | CONFIRMED                 | 1.2             | 1.4          | 1.4          | 1.4             | 1.2          | 1.1          | 1.3             | 1.4          | 1.0          | 1.3        | 0.1   | 4     | oxidation of glycerol                 |
| 11.58                        | Unknown Nic.Related Comp.(RRT 0.777)    | NA         | NA                        | ND              | 0.7          | ND           | ND              | ND           | ND           | 0.8             | 0.8          | 0.7          | 0.8        | 0.1   | 4     | Nicotine degradant                    |
| 12.30                        | Piperonal                               | 120-57-0   | CONFIRMED                 | 1.7             | 2.0          | 1.9          | 1.7             | 1.5          | 1.6          | 2.5             | 2.8          | 2.5          | 2.0        | 0.5   | 1     | Flavorant                             |
| 12.35                        | Glyceryl monoacetate                    | 106-61-6   | CONFIRMED                 | 33.8            | 43.7         | 44.9         | 13.9            | 13.6         | 13.2         | 20.9            | 25.6         | 20.8         | 25.6       | 12.5  | 4     | VG esterification/transesterification |
| 12.70                        | 3-(1,3-dimethylpyrrol-2-yl)pyridine     | 78210-38-5 | CONFIRMED                 | 4.7             | 4.8          | 5.7          | 4.5             | 4.4          | 4.6          | 4.8             | 5.6          | 4.8          | 4.9        | 0.5   | 4     | Nicotine degradant                    |
| 13.57                        | Unknown Nic. Related Comp.(RRT 0.849)   | NA         | NA                        | ND              | 3.1          | 2.1          | 7.8             | 4.4          | 4.2          | 4.0             | 4.0          | 3.4          | 4.1        | 1.7   | 4     | Nicotine degradant                    |
| 13.90                        | 3-(1,3-dimethylpyrrol-2-yl)pyridine Iso | 78210-38-5 | HIGH                      | 1.4             | 1.4          | 1.5          | 1.7             | 1.6          | 2.0          | 2.3             | 1.9          | 1.7          | 1.7        | 0.3   | 4     | Nicotine degradant                    |
| 14.31                        | 1,3-Ethoxyethylideneglycerol            | NA         | MEDIUM                    | 3.2             | 3.8          | 4.6          | 6.9             | 6.8          | 7.3          | 6.5             | 7.2          | 6.3          | 5.9        | 1.6   | 4     | VG degradant                          |
| 14.41                        | Unknown Nic. Related Comp. (RRT 0.956)  | NA         | NA                        | ND              | ND           | ND           | ND              | ND           | 1.2          | 0.8             | ND           | 1.1          | 1.0        | 0.2   | 4     | Nicotine degradant                    |
| 14.53                        | p-Dioxane-2,5-dimethanol                | 14236-12-5 | CONFIRMED                 | 15.7            | 18.7         | 16.7         | 13.8            | 12.8         | 11.9         | 14.6            | 16.1         | 14.8         | 15.0       | 2.1   | 4     | 2VG dehydration                       |
| 14.60                        | Unknown Nic.Related Comp.(RRT 0.970)    | NA         | NA                        | 3.2             | 3.4          | 2.5          | 6.6             | 6.4          | 7.2          | 5.7             | 5.7          | 6.2          | 5.2        | 1.7   | 4     | Nicotine degradant                    |
| 14.66                        | N-Propylornicotine                      | 91907-45-8 | CONFIRMED                 | 2.3             | 2.6          | 2.4          | 2.3             | 2.0          | 2.3          | 3.6             | 4.0          | 3.5          | 2.8        | 0.7   | 4     | Nicotine degradant                    |
| 14.70                        | Bis(2,6-hydroxymethyl) dioxane          | 54120-69-3 | CONFIRMED                 | 63.1            | 75.5         | 69.4         | 49.2            | 46.2         | 47.8         | 54.7            | 59.1         | 55.5         | 57.8       | 10.0  | 4     | 2VG dehydration                       |
| 14.72                        | Bis(2,6 hydroxymethyl) dioxane - Iso2   | 54120-69-3 | HIGH                      | ND              | ND           | ND           | ND              | 6.3          | ND           | 8.6             | ND           | ND           | 7.5        | 1.7   | 4     | 2VG dehydration                       |
| 14.89                        | Bis(2,6 hydroxymethyl) dioxane - Iso3   | 54120-69-3 | HIGH                      | 56.2            | 68.3         | 59.7         | 33.0            | 46.9         | 29.0         | 89.9            | 85.7         | 67.6         | 59.6       | 21.1  | 4     | 2VG dehydration                       |
| 15.00                        | Bis(2,6-hydroxymethyl) dioxane - Iso4   | 54120-69-3 | HIGH                      | 36.8            | 44.1         | 41.4         | 29.4            | 27.3         | 21.6         | 31.5            | 34.2         | ND           | 33.3       | 7.4   | 4     | 2VG dehydration                       |
| 15.19                        | Unknown Nic.Related Comp.(RRT 1.012)    | NA         | NA                        | 2.6             | ND           | 5.6          | 5.3             | 5.2          | 4.2          | 3.2             | 4.3          | 4.4          | 4.4        | 1.0   | 4     | Nicotine degradant                    |
| 15.20                        | Bis(2,6-hydroxymethyl) dioxane - Iso5   | 54120-69-3 | HIGH                      | 13.5            | 16.0         | 14.0         | 13.0            | 10.8         | 12.1         | 12.9            | 14.6         | 13.7         | 13.4       | 1.5   | 4     | 2VG dehydration                       |
| 15.88                        | N-Methylnicotinamide                    | 114-33-0   | CONFIRMED                 | 0.8             | ND           | 0.7          | ND              | 2.0          | ND           | ND              | ND           | ND           | 1.2        | 0.7   | 4     | Nicotine degradant                    |
| 16.80                        | Hexadecanoic Acid                       | 57-10-3    | CONFIRMED                 | 2.3             | 4.7          | 2.6          | 2.1             | 2.6          | 2.5          | 2.2             | 3.2          | 2.0          | 2.7        | 0.8   | 3     | E&L                                   |



**Table S8 GC-MS Characterization of Aerosol Collected Under Intense Puffing Regime from Three Batches of Menthol 5.0% at T=0**

| Library Retention Time (min) | Compound                                           | CAS#         | Identification Confidence | Batch HH26PG06A |              |              | Batch HH26PH06A |              |              | Batch HH26PI06A |              |              | Avg (µg/g) | Stdev | Group | Rationalization    |
|------------------------------|----------------------------------------------------|--------------|---------------------------|-----------------|--------------|--------------|-----------------|--------------|--------------|-----------------|--------------|--------------|------------|-------|-------|--------------------|
|                              |                                                    |              |                           | Rep-1 (µg/g)    | Rep-2 (µg/g) | Rep-3 (µg/g) | Rep-1 (µg/g)    | Rep-2 (µg/g) | Rep-3 (µg/g) | Rep-1 (µg/g)    | Rep-2 (µg/g) | Rep-3 (µg/g) |            |       |       |                    |
| 16.84                        | Unknown (RRT 1.132)                                | NA           | NA                        | 0.9             | 1.0          | 1.1          | 0.9             | 0.8          | 1.0          | 0.9             | 1.2          | 0.9          | 1.0        | 0.1   | 5     | NR                 |
| 17.00                        | 2-(beta nicotyrine)acetaldehyde Iso-1 <sup>a</sup> | NA           | MEDIUM                    | 1.6             | 2.6          | 4.8          | 2.0             | 2.3          | 2.3          | 1.7             | 2.1          | 2.2          | 2.4        | 1.0   | 4     | Nicotine degradant |
| 17.50                        | 1-(beta nicotyrine)propan-2-one Iso-1 <sup>a</sup> | 2416242-88-9 | HIGH                      | 10.7            | 10.4         | 10.9         | 10.4            | 10.1         | 10.1         | 11.1            | 12.6         | 11.0         | 10.8       | 0.8   | 4     | Nicotine degradant |
| 17.59                        | Unknown (RRT 1.175)                                | NA           | NA                        | 1.8             | ND           | 2.1          | 1.6             | 1.3          | 1.4          | 1.5             | 2.1          | ND           | 1.7        | 0.0   | 5     | NR                 |
| 17.70                        | N-Formylornicotine                                 | 3000-81-5    | CONFIRMED                 | ND              | 0.9          | 0.7          | ND              | 0.7          | ND           | ND              | ND           | 0.9          | 0.8        | 0.1   | 4     | Nicotine degradant |
| 18.76                        | Unknown Nic. Related Comp. (RRT 1.246)             | NA           | NA                        | 1.0             | 2.0          | 2.8          | 1.4             | 1.1          | 1.1          | 0.9             | 1.0          | 1.0          | 1.4        | 0.6   | 4     | Nicotine degradant |
| 19.08                        | Caffeine                                           | 58-08-2      | CONFIRMED                 | 13.0            | 15.8         | 14.5         | 14.7            | 13.1         | 14.0         | 14.0            | 15.4         | 14.4         | 14.3       | 0.9   | 1     | Flavorant          |
| 19.80                        | 1-(beta nicotyrine)propan-2-one Iso-2 <sup>a</sup> | 2416242-88-9 | HIGH                      | 24.7            | 24.1         | 24.9         | 24.3            | 22.9         | 23.1         | 26.0            | 28.2         | 24.7         | 24.8       | 1.6   | 4     | Nicotine degradant |

<sup>a</sup> 1-(beta nicotyrine)propan-2-one: 1-(1-methyl-5-(pyridine-3-yl)-1H-pyrrol-2-yl)propan-2-one

<sup>a</sup> 2-(beta nicotyrine)acetaldehyde: 2-(1-methyl-5-(pyridine-3-yl)-1H-pyrrol-2-yl)acetaldehyde

NR = Not Rationalized

**Table S9 GC-MS Characterization of Aerosol Collected Under Non-Intense Puffing Regime from Three Batches of Menthol 5.0% at T=0**

| Library Retention Time (min) | Compound                                | CAS #    | Identification Confidence | Batch HH26PG06A |              |              | Batch HH26PH06A |              |              | Batch HH26PI06A |              |              | Avg (µg/g) | Stdev | Group | Rationalization                                                           |
|------------------------------|-----------------------------------------|----------|---------------------------|-----------------|--------------|--------------|-----------------|--------------|--------------|-----------------|--------------|--------------|------------|-------|-------|---------------------------------------------------------------------------|
|                              |                                         |          |                           | Rep-1 (µg/g)    | Rep-2 (µg/g) | Rep-3 (µg/g) | Rep-1 (µg/g)    | Rep-2 (µg/g) | Rep-3 (µg/g) | Rep-1 (µg/g)    | Rep-2 (µg/g) | Rep-3 (µg/g) |            |       |       |                                                                           |
| 3.62                         | Decamethylcycl opentasiloxane Isomer 2  | 541-02-6 | CONFIRMED                 | 12.9            | 10.5         | 8.7          | 9.1             | 7.6          | 8.9          | 9.9             | 11.5         | 9.4          | 9.8        | 1.6   | 3     | E&L                                                                       |
| 4.08                         | Pyridine                                | 110-86-1 | CONFIRMED                 | 1.4             | 1.2          | 1.4          | ND              | 1.2          | ND           | 2.0             | 1.5          | ND           | 1.4        | 0.3   | 1     | Flavorant                                                                 |
| 4.14                         | 1,8-Cineole                             | 470-82-6 | HIGH                      | ND              | ND           | ND           | ND              | 0.7          | ND           | 0.7             | ND           | ND           | 0.7        | 0.0   | 1     | Flavorant                                                                 |
| 5.04                         | Hydroxyacetone                          | 116-09-6 | CONFIRMED                 | 8.9             | 8.7          | 10.8         | 9.0             | 11.1         | 9.6          | 10.7            | 8.3          | 8.3          | 9.5        | 1.1   | 4     | dehydration of glycerol and/or oxidation of PG                            |
| 5.61                         | 1-((ethoxydimethylsilyl)oxy)propan-2-ol | NA       | MEDIUM                    | ND              | ND           | ND           | ND              | ND           | ND           | ND              | 0.7          | ND           | 0.7        | 0.0   | 4     | hydrolysis of E&L source compound (such as dodecamethylcycl hexasiloxane) |

**Table S9 GC-MS Characterization of Aerosol Collected Under Non-Intense Puffing Regime from Three Batches of Menthol 5.0% at T=0**

| Library Retention Time (min) | Compound                                | CAS #      | Identification Confidence | Batch HH26PG06A |              |              | Batch HH26PH06A |              |              | Batch HH26PI06A |              |              | Avg (µg/g) | Stdev | Group | Rationalization               |
|------------------------------|-----------------------------------------|------------|---------------------------|-----------------|--------------|--------------|-----------------|--------------|--------------|-----------------|--------------|--------------|------------|-------|-------|-------------------------------|
|                              |                                         |            |                           | Rep-1 (µg/g)    | Rep-2 (µg/g) | Rep-3 (µg/g) | Rep-1 (µg/g)    | Rep-2 (µg/g) | Rep-3 (µg/g) | Rep-1 (µg/g)    | Rep-2 (µg/g) | Rep-3 (µg/g) |            |       |       |                               |
| 6.50                         | Acetic acid                             | 64-19-7    | CONFIRMED                 | 14.1            | 9.2          | 6.2          | ND              | 6.7          | 8.5          | 7.4             | 7.6          | ND           | 8.5        | 2.6   | 1     | Flavorant                     |
| 6.63                         | Menthone                                | 89-80-5    | CONFIRMED                 | 16.3            | 16.5         | 18.0         | 16.6            | 17.1         | 16.7         | 19.5            | 16.4         | 14.8         | 16.9       | 1.3   | 4     | oxidized menthol              |
| 6.70                         | Menthofuran                             | 494-90-6   | CONFIRMED                 | 0.8             | 0.7          | 0.8          | 0.7             | ND           | 0.7          | 0.9             | 0.7          | ND           | 0.8        | 0.1   | 1     | Flavorant                     |
| 6.79                         | Isomenthone                             | 491-07-6   | CONFIRMED                 | 6.3             | 6.2          | 6.9          | 6.3             | 6.4          | 6.2          | 7.4             | 6.1          | 5.6          | 6.4        | 0.5   | 1     | Flavorant                     |
| 7.07                         | 1,3Dioxolane-2methanol_2,4dimethyl-Iso1 | 53951-43-2 | MEDIUM                    | 3.4             | 3.4          | 3.7          | 6.5             | 6.9          | 6.8          | 7.1             | 6.0          | 5.2          | 5.4        | 1.6   | 4     | PG degradant                  |
| 7.20                         | 1,3Dioxolane-2methanol_2,4dimethyl-Iso2 | 53951-43-2 | MEDIUM                    | 1.6             | 1.6          | 1.8          | 3.1             | 3.4          | 3.5          | 3.6             | 2.9          | 2.6          | 2.7        | 0.8   | 4     | PG degradant                  |
| 7.20                         | Linalool                                | 78-70-6    | CONFIRMED                 | 0.9             | 1.0          | 1.1          | 1.0             | 1.0          | 0.9          | 1.2             | 0.9          | 0.9          | 1.0        | 0.1   | 1     | Flavorant                     |
| 7.31                         | Linalyl acetate                         | 115-95-7   | CONFIRMED                 | 1.2             | 1.1          | 1.2          | 1.1             | 1.2          | 1.2          | 1.4             | 1.2          | 1.1          | 1.2        | 0.1   | 1     | Flavorant                     |
| 7.40                         | Menthyl acetate                         | 89-48-5    | CONFIRMED                 | 3.9             | 4.1          | 4.4          | 3.0             | 3.1          | 2.9          | 3.6             | 3.0          | 2.6          | 3.4        | 0.6   | 1     | Flavorant                     |
| 7.42                         | Isopulegol                              | 89-79-2    | CONFIRMED                 | 2.5             | 2.5          | 2.9          | 2.6             | 2.7          | 2.6          | 3.1             | 2.6          | 2.2          | 2.6        | 0.3   | 4     | reduction of isopulegone      |
| 7.56                         | 1,3-Dioxolane-4-methanol_2,2-dimethyl-  | 100-79-8   | CONFIRMED                 | 52.4            | 58.0         | 60.9         | 59.1            | 56.6         | 60.2         | 74.5            | 44.7         | 54.7         | 57.9       | 8.0   | 4     | VG degradant                  |
| 7.68                         | Ethanone_1-(2-pyridinyl)-               | 1122-62-9  | CONFIRMED                 | 17.2            | 17.2         | 19.0         | 15.6            | 15.6         | 15.2         | 19.4            | 16.3         | 14.5         | 16.7       | 1.7   | 1     | Flavorant                     |
| 7.78                         | Terpinen-4-ol                           | 562-74-3   | CONFIRMED                 | 0.8             | ND           | 0.9          | 0.8             | 0.9          | 0.8          | 1.0             | 0.8          | ND           | 0.9        | 0.1   | 1     | Flavorant                     |
| 7.91                         | Acetylpyrazine                          | 22047-25-2 | CONFIRMED                 | 2.0             | 2.1          | 2.6          | 2.0             | 2.0          | 1.9          | 2.3             | 1.9          | 1.7          | 2.0        | 0.3   | 1     | Flavorant                     |
| 8.00                         | Methyl benzoate                         | 93-58-3    | CONFIRMED                 | 5.2             | 4.1          | 6.2          | 4.6             | 4.3          | 5.7          | 7.3             | 4.0          | 4.1          | 5.0        | 1.1   | 4     | benzoic acid + MeOH           |
| 8.24                         | Lavandulol                              | 498-16-8   | CONFIRMED                 | 1.8             | 1.5          | 1.7          | 1.1             | 1.7          | 1.6          | 2.0             | 1.5          | 1.5          | 1.6        | 0.2   | 1     | Flavorant                     |
| 8.20                         | 5-Methyl-2-(1-methylethyl)-Cyclohexanol | 1490-04-6  | CONFIRMED                 | 4.1             | 4.5          | 3.7          | 4.0             | 3.9          | 4.1          | 5.3             | 4.1          | 3.3          | 4.1        | 0.5   | 1     | Isomer of menthol (Flavorant) |
| 8.21                         | Pulegone                                | 89-82-7    | CONFIRMED                 | 1.4             | 1.4          | 2.4          | 2.4             | 1.4          | 1.4          | 1.7             | 1.4          | 1.9          | 1.7        | 0.4   | 1     | Flavorant                     |

**Table S9 GC-MS Characterization of Aerosol Collected Under Non-Intense Puffing Regime from Three Batches of Menthol 5.0% at T=0**

| Library Retention Time (min) | Compound                               | CAS #      | Identification Confidence | Batch HH26PG06A |              |              | Batch HH26PH06A |              |              | Batch HH26PI06A |              |              | Avg (µg/g) | Stdev | Group | Rationalization                   |
|------------------------------|----------------------------------------|------------|---------------------------|-----------------|--------------|--------------|-----------------|--------------|--------------|-----------------|--------------|--------------|------------|-------|-------|-----------------------------------|
|                              |                                        |            |                           | Rep-1 (µg/g)    | Rep-2 (µg/g) | Rep-3 (µg/g) | Rep-1 (µg/g)    | Rep-2 (µg/g) | Rep-3 (µg/g) | Rep-1 (µg/g)    | Rep-2 (µg/g) | Rep-3 (µg/g) |            |       |       |                                   |
| 8.47                         | 1,3-Dioxolane_4-methyl-2-pentyl-       | 1599-49-1  | LOW                       | ND              | ND           | ND           | 7.2             | 7.3          | 7.1          | 7.2             | 6.3          | 5.4          | 6.7        | 0.7   | 4     | PG + hexanal                      |
| 8.47                         | Terpinyl propionate                    | 80-27-3    | MEDIUM                    | 0.7             | 0.9          | 0.8          | 0.7             | 0.7          | ND           | 0.8             | 0.7          | ND           | 0.8        | 0.1   | 1     | Flavorant                         |
| 8.66                         | Nicotinealdehyde                       | 500-22-1   | CONFIRMED                 | 1.5             | 1.5          | 1.7          | 1.4             | 1.5          | 1.6          | 1.6             | 1.5          | 1.3          | 1.5        | 0.1   | 4     | demethylation of 3-acetylpyridine |
| 8.66                         | Unknown Nic. Related Comp. (RRT 0.575) | NA         | NA                        | ND              | ND           | ND           | 1.5             | 1.9          | ND           | 1.8             | 1.6          | ND           | 1.7        | 0.2   | 4     | Nicotine degradant                |
| 8.80                         | Piperitone                             | 89-81-6    | CONFIRMED                 | ND              | ND           | 0.7          | ND              | 0.7          | ND           | 0.7             | 0.7          | ND           | 0.7        | 0.0   | 1     | Flavorant                         |
| 9.40                         | beta-Damascenone                       | 23726-93-4 | CONFIRMED                 | 3.2             | 3.3          | 3.6          | 3.2             | 3.3          | 3.3          | 4.1             | 3.4          | 2.8          | 3.4        | 0.3   | 1     | Flavorant                         |
| 9.52                         | N,2,3-trimethyl-2-isopropylbutamide    | 51115-67-4 | CONFIRMED                 | 73.4            | 75.7         | 81.0         | 71.7            | 75.1         | 73.3         | 88.3            | 73.3         | 63.3         | 75.0       | 6.8   | 1     | Flavorant                         |
| 9.61                         | (Z)-beta-Damascenone                   | 23726-92-3 | CONFIRMED                 | 36.1            | 33.9         | 31.4         | 32.9            | 33.0         | 34.3         | 37.5            | 32.3         | 23.6         | 32.8       | 3.9   | 1     | Flavorant                         |
| 9.95                         | 2-(4-methoxyphenyl)-1-pyrroline        | NA         | MEDIUM                    | 3.4             | 4.3          | 3.8          | 3.8             | 3.9          | 4.0          | 4.5             | 4.2          | 3.5          | 3.9        | 0.4   | 4     | Nicotine degradant                |
| 9.99                         | Unknown Nic. Related Comp. (RRT 0.663) | NA         | NA                        | 3.6             | 4.0          | 4.1          | 3.8             | ND           | ND           | ND              | 4.1          | 3.1          | 3.8        | 0.4   | 4     | Nicotine degradant                |
| 10.11                        | Unknown Nic. Related Comp. (RRT 0.670) | NA         | NA                        | ND              | ND           | 0.9          | ND              | 0.7          | ND           | 0.9             | 0.8          | ND           | 0.8        | 0.1   | 4     | Nicotine degradant                |
| 10.53                        | N-methyl-4-(3-pyridyl)-3-buten-1-amine | 15585-43-0 | HIGH                      | 4.4             | 4.8          | 4.9          | 4.3             | 4.7          | 4.4          | 6.1             | 4.9          | 4.4          | 4.8        | 0.6   | 4     | Nicotine degradant                |
| 10.55                        | N-Methylanabasine                      | 24380-92-5 | CONFIRMED                 | 2.8             | 2.9          | 3.0          | 2.7             | 2.8          | 2.8          | 3.9             | 2.9          | 2.6          | 2.9        | 0.4   | 4     | Nicotine degradant                |
| 10.55                        | Phenol                                 | 108-95-2   | CONFIRMED                 | ND              | ND           | 1.4          | ND              | ND           | ND           | 1.7             | ND           | ND           | 1.6        | 0.2   | 2     | HPHC                              |

**Table S9 GC-MS Characterization of Aerosol Collected Under Non-Intense Puffing Regime from Three Batches of Menthol 5.0% at T=0**

| Library Retention Time (min) | Compound                                | CAS #      | Identification Confidence | Batch HH26PG06A |              |              | Batch HH26PH06A |              |              | Batch HH26PI06A |              |              | Avg (µg/g) | Stdev | Group | Rationalization                                                |
|------------------------------|-----------------------------------------|------------|---------------------------|-----------------|--------------|--------------|-----------------|--------------|--------------|-----------------|--------------|--------------|------------|-------|-------|----------------------------------------------------------------|
|                              |                                         |            |                           | Rep-1 (µg/g)    | Rep-2 (µg/g) | Rep-3 (µg/g) | Rep-1 (µg/g)    | Rep-2 (µg/g) | Rep-3 (µg/g) | Rep-1 (µg/g)    | Rep-2 (µg/g) | Rep-3 (µg/g) |            |       |       |                                                                |
| 10.60                        | Unknown Nic. Related Comp. (RRT 0.708)  | NA         | NA                        | ND              | 0.8          | 0.9          | 0.7             | 0.7          | 0.9          | ND              | ND           | ND           | 0.8        | 0.1   | 4     | Nicotine degradant                                             |
| 11.10                        | Unknown Nic. Related Comp. (RRT 0.727)  | NA         | NA                        | 5.0             | 4.7          | 3.2          | 4.1             | 2.3          | 5.4          | 4.0             | 4.4          | 2.8          | 4.0        | 1.0   | 4     | Nicotine degradant                                             |
| 11.58                        | Unknown Nic. Related Comp. (RRT 0.777)  | NA         | NA                        | ND              | ND           | ND           | ND              | ND           | ND           | 0.9             | 0.8          | ND           | 0.8        | 0.1   | 4     | Nicotine degradant                                             |
| 12.30                        | Piperonal                               | 120-57-0   | CONFIRMED                 | 1.8             | 1.8          | 2.0          | 1.6             | 1.7          | 1.6          | 2.9             | 2.3          | 2.0          | 2.0        | 0.4   | 1     | Flavorant                                                      |
| 12.70                        | Unknown Nic Related Comp. (RRT 0.840)   | NA         | NA                        | 0.7             | ND           | ND           | ND              | ND           | ND           | ND              | ND           | ND           | 0.7        | 0.0   | 4     | Nicotine degradant                                             |
| 12.70                        | 3-(1,3-dimethylpyrrol-2-yl)pyridine     | 78210-38-5 | CONFIRMED                 | 4.9             | 4.3          | 4.9          | 4.2             | 4.4          | 5.1          | 4.7             | 4.2          | 3.8          | 4.5        | 0.4   | 4     | Nicotine degradant                                             |
| 12.76                        | Propanedioic acid                       | 141-82-2   | LOW                       | 29.8            | 31.7         | 33.3         | ND              | ND           | ND           | ND              | ND           | ND           | 31.6       | 1.7   | 4     | propionic acid to hydroxypropionic acid, followed by oxidation |
| 12.89                        | Unknown Nic. Related Comp. (RRT 0.855)  | NA         | NA                        | 4.2             | 4.9          | 5.7          | 7.3             | 7.8          | 7.6          | 8.8             | 7.0          | 5.6          | 6.6        | 1.5   | 4     | Nicotine degradant                                             |
| 13.57                        | Unknown Nic. Related Comp. (RRT 0.849)  | NA         | NA                        | ND              | 2.9          | ND           | 3.5             | 4.1          | 4.4          | 4.7             | 3.8          | 3.2          | 3.8        | 0.7   | 4     | Nicotine degradant                                             |
| 13.90                        | 3-(1,3-dimethylpyrrol-2-yl)pyridine Iso | 78210-38-5 | HIGH                      | 3.5             | 3.2          | 3.6          | 3.3             | 3.3          | 4.3          | 4.3             | 3.6          | 3.3          | 3.6        | 0.4   | 4     | Nicotine degradant                                             |
| 13.99                        | 2-hydroxypropyl benzoate                | 37086-84-3 | CONFIRMED                 | 11.0            | 11.3         | 12.6         | 12.6            | 13.5         | 13.6         | 16.1            | 13.5         | 11.8         | 12.9       | 1.5   | 4     | benzoic acid with alcohol esterification                       |
| 14.31                        | 1,3-Ethoxyethylidene glycerol           | NA         | MEDIUM                    | 2.6             | 2.5          | ND           | 5.5             | 5.3          | 5.8          | 6.2             | 5.0          | 4.2          | 4.6        | 1.4   | 4     | VG degradant                                                   |
| 14.53                        | p-Dioxane-2,5-dimethanol                | 14236-12-5 | CONFIRMED                 | 17.7            | 18.6         | 17.3         | 12.7            | 13.4         | 13.1         | 17.0            | 14.1         | 12.4         | 15.1       | 2.4   | 4     | 2VG dehydration                                                |
| 14.60                        | Unknown Nic. Related                    | NA         | NA                        | 2.5             | 3.4          | 4.0          | 5.5             | 5.2          | 5.6          | 5.8             | 4.7          | 4.6          | 4.6        | 1.1   | 4     | Nicotine degradant                                             |

**Table S9 GC-MS Characterization of Aerosol Collected Under Non-Intense Puffing Regime from Three Batches of Menthol 5.0% at T=0**

| Library Retention Time (min) | Compound                                           | CAS #        | Identification Confidence | Batch HH26PG06A |              |              | Batch HH26PH06A |              |              | Batch HH26PI06A |              |              | Avg (µg/g) | Stdev | Group | Rationalization                                    |
|------------------------------|----------------------------------------------------|--------------|---------------------------|-----------------|--------------|--------------|-----------------|--------------|--------------|-----------------|--------------|--------------|------------|-------|-------|----------------------------------------------------|
|                              |                                                    |              |                           | Rep-1 (µg/g)    | Rep-2 (µg/g) | Rep-3 (µg/g) | Rep-1 (µg/g)    | Rep-2 (µg/g) | Rep-3 (µg/g) | Rep-1 (µg/g)    | Rep-2 (µg/g) | Rep-3 (µg/g) |            |       |       |                                                    |
|                              | Comp.(RRT 0.970)                                   |              |                           |                 |              |              |                 |              |              |                 |              |              |            |       |       |                                                    |
| 14.66                        | N-Propyl nicotinic acid                            | 91907-45-8   | CONFIRMED                 | 2.8             | 2.9          | 3.0          | 2.6             | 2.6          | 2.9          | 4.7             | 3.9          | 3.2          | 3.2        | 0.7   | 4     | Nicotine degradant                                 |
| 14.70                        | Bis(2,6-hydroxymethyl) dioxane                     | 54120-69-3   | CONFIRMED                 | 63.0            | 46.6         | 45.9         | 31.3            | 31.5         | 32.3         | 63.2            | 51.0         | 45.2         | 45.6       | 12.4  | 4     | 2VG dehydration                                    |
| 14.89                        | Bis(2,6-hydroxymethyl) dioxane - Iso3              | 54120-69-3   | HIGH                      | 30.3            | 31.7         | 33.9         | 21.9            | 22.5         | 23.0         | 29.9            | 23.3         | 156.3        | 41.4       | 43.3  | 4     | 2VG dehydration                                    |
| 15.00                        | Bis(2,6-hydroxymethyl) dioxane - Iso4              | 54120-69-3   | HIGH                      | 36.1            | 40.5         | 39.1         | 25.7            | 28.0         | 26.8         | 42.1            | 29.9         | 27.0         | 32.8       | 6.6   | 4     | 2VG dehydration                                    |
| 15.19                        | Unknown Nic.Related Comp.(RRT 1.012)               | NA           | NA                        | 2.1             | 1.3          | ND           | 4.3             | 4.0          | 4.1          | 4.5             | 3.3          | 3.3          | 3.3        | 1.1   | 4     | Nicotine degradant                                 |
| 15.20                        | Bis(2,6-hydroxymethyl) dioxane - Iso5              | 54120-69-3   | HIGH                      | 12.2            | 18.5         | 13.4         | 10.0            | 10.7         | 10.0         | 13.7            | 11.1         | 9.8          | 12.1       | 2.8   | 4     | 2VG dehydration                                    |
| 16.50                        | Unknown Nic. Related Comp. (RRT 1.098)             | NA           | NA                        | 2.0             | 1.9          | 3.5          | ND              | 2.0          | 1.4          | 2.0             | 1.8          | ND           | 2.1        | 0.6   | 4     | Nicotine degradant                                 |
| 16.56                        | Unknown (RRT 1.098)                                | NA           | NA                        | ND              | ND           | ND           | ND              | ND           | ND           | ND              | ND           | 1.3          | 1.3        | 0.0   | 5     | NR                                                 |
| 16.80                        | Hexadecanoic Acid                                  | 57-10-3      | CONFIRMED                 | 6.0             | 3.8          | 2.6          | 3.0             | 2.9          | 3.3          | 4.2             | 3.2          | 1.8          | 3.4        | 1.2   | 3     | E&L                                                |
| 17.00                        | 2-(beta nicotyrine)acetaldehyde Iso-1 <sup>a</sup> | NA           | MEDIUM                    | 0.9             | ND           | 1.6          | 0.8             | 7.4          | 0.7          | 1.2             | ND           | 2.9          | 2.2        | 2.4   | 4     | Nicotine degradant                                 |
| 17.36                        | Phenol_2-(1-phenylethyl)-                          | 4237-44-9    | CONFIRMED                 | 1.0             | 1.4          | ND           | ND              | 0.9          | ND           | ND              | ND           | ND           | 1.1        | 0.3   | 4     | Phenylethanol (from phenylethyl acetate ) + phenol |
| 17.50                        | 1-(beta nicotyrine)propan-2-one Iso-1 <sup>a</sup> | 2416242-88-9 | HIGH                      | 9.1             | 8.8          | 9.9          | 8.6             | 9.0          | 12.1         | 10.7            | 9.3          | 9.0          | 9.6        | 1.1   | 4     | Nicotine degradant                                 |
| 18.60                        | Octadecanoic acid                                  | 57-11-4      | CONFIRMED                 | ND              | 2.0          | 2.1          | 2.5             | ND           | 2.6          | 1.0             | ND           | ND           | 2.0        | 0.6   | 3     | E&L                                                |
| 18.76                        | Unknown Nic. Related Comp. (RRT 1.246)             | NA           | NA                        | 2.0             | 1.7          | 3.4          | 2.0             | 6.4          | 1.2          | 1.8             | 3.6          | 2.2          | 2.7        | 1.6   | 4     | Nicotine degradant                                 |

**Table S9 GC-MS Characterization of Aerosol Collected Under Non-Intense Puffing Regime from Three Batches of Menthol 5.0% at T=0**

| Library Retention Time (min) | Compound                                           | CAS #        | Identification Confidence | Batch HH26PG06A |              |              | Batch HH26PH06A |              |              | Batch HH26PI06A |              |              | Avg (µg/g) | Stdev | Group | Rationalization    |
|------------------------------|----------------------------------------------------|--------------|---------------------------|-----------------|--------------|--------------|-----------------|--------------|--------------|-----------------|--------------|--------------|------------|-------|-------|--------------------|
|                              |                                                    |              |                           | Rep-1 (µg/g)    | Rep-2 (µg/g) | Rep-3 (µg/g) | Rep-1 (µg/g)    | Rep-2 (µg/g) | Rep-3 (µg/g) | Rep-1 (µg/g)    | Rep-2 (µg/g) | Rep-3 (µg/g) |            |       |       |                    |
| 19.08                        | Caffeine                                           | 58-08-2      | CONFIRMED                 | 12.9            | 14.4         | 14.1         | 13.1            | 14.0         | 13.6         | 16.2            | 12.8         | 11.7         | 13.6       | 1.3   | 1     | Flavorant          |
| 19.80                        | 1-(beta nicotyrine)propan-2-one Iso-2 <sup>a</sup> | 2416242-88-9 | HIGH                      | 21.0            | 21.3         | 24.0         | 21.4            | 21.7         | 26.0         | 25.7            | 22.4         | 21.6         | 22.8       | 2.0   | 4     | Nicotine degradant |

<sup>a</sup> 1-(beta nicotyrine)propan-2-one: 1-(1-methyl-5-(pyridine-3-yl)-1H-pyrrol-2-yl)propan-2-one

<sup>a</sup> 2-(beta nicotyrine)acetaldehyde: 2-(1-methyl-5-(pyridine-3-yl)-1H-pyrrol-2-yl)acetaldehyde

NR = Not Rationalized

**Table S10 LC-HRMS Characterization of Aerosol Collected Under Intense Puffing Regime from Three Batches of Menthol 5.0% at T=0**

| RT<br>[min] | RRT  | Name                                             | CAS #     | Confidence<br>Level | Estimated Amount µg/g |       |       |                 |       |       |                 |       |       | Avg<br>(µg/g) | Stddev | P-Value  | Group | Rationalization                                      |
|-------------|------|--------------------------------------------------|-----------|---------------------|-----------------------|-------|-------|-----------------|-------|-------|-----------------|-------|-------|---------------|--------|----------|-------|------------------------------------------------------|
|             |      |                                                  |           |                     | Batch HH26PG06A       |       |       | Batch HH26PH06A |       |       | Batch HH26PI06A |       |       |               |        |          |       |                                                      |
|             |      |                                                  |           |                     | Rep 1                 | Rep 2 | Rep 3 | Rep 1           | Rep 2 | Rep 3 | Rep 1           | Rep 2 | Rep 3 |               |        |          |       |                                                      |
| 2.14        | 0.16 | unknown PG_VG<br>related compound RRT<br>0.16    | NA        | NA                  | 3.6                   | 3.1   | 5     | 3.6             | 4.1   | 3.5   | 4.2             | 3     | 3.7   | 3.8           | 0.6    | 4.70E-09 | 4     | dehydration of PG<br>VG to form<br>conjugate         |
| 2.25        | 0.17 | unknown PG_VG<br>related compound RRT<br>0.17    | NA        | NA                  | 31.4                  | 27.5  | 30.4  | 31.4            | 37    | 29.7  | 32              | 37    | 36.6  | 32.6          | 3.5    | 3.60E-10 | 4     | dehydration of PG<br>VG to form<br>conjugate         |
| 2.44        | 0.18 | Hydroxyacetone                                   | 116-09-6  | high                | 5.7                   | 4.2   | 5     | 3.6             | 5.3   | 3.6   | 4.5             | 4.1   | 4.4   | 4.5           | 0.7    | 4.40E-03 | 4     | dehydration of<br>glycerol and/or<br>oxidation of PG |
| 2.63        | 0.19 | 4-<br>methoxybenzaldehyde                        | 123-11-5  | high                | 4.2                   | 3     | 3.5   | 3.2             | 3.8   | 3.1   | 3.9             | 3.8   | 3.6   | 3.6           | 0.4    | 3.00E-02 | 4     | methoxylated<br>benzaldehyde                         |
| 3.09        | 0.23 | unknown nicotine<br>related compound RRT<br>0.23 | NA        | NA                  | 30.4                  | 29.4  | 28.2  | 39.3            | 25.1  | 39.9  | 26.8            | 22.9  | 36.1  | 30.9          | 6.2    | 4.50E-05 | 4     | nicotine degradant                                   |
| 4.23        | 0.31 | theobromine                                      | 83-67-0   | high                | 6.5                   | 4.9   | 5.1   | 5.2             | 6.4   | 4.2   | 6.2             | 6.1   | 6.4   | 5.7           | 0.8    | 1.00E-10 | 1     | Flavorant                                            |
| 6.99        | 0.51 | caffeine                                         | 58-08-2   | confirmed           | 19.6                  | 17.4  | 22.6  | 32.1            | 19.1  | 23.2  | 17.2            | 19.4  | 19.6  | 21.1          | 4.6    | NA       | 1     | Flavorant                                            |
| 9.69        | 0.71 | unknown nicotine<br>related compound RRT<br>0.71 | NA        | NA                  | 6.9                   | 6.9   | 8.8   | 10.6            | 8.8   | 9     | 7.4             | 7.9   | 7.5   | 8.2           | 1.2    | 7.30E-03 | 4     | nicotine degradant                                   |
| 10          | 0.74 | 2,3-dihydroxypropyl<br>benzoate                  | 3376-59-8 | high                | 75.8                  | 61.9  | 61.9  | 58.4            | 107.6 | 61.6  | 82.1            | 79.7  | 84.5  | 74.8          | 15.9   | 1.40E-09 | 4     | benzoic acid +<br>VG                                 |

**Table S10 LC-HRMS Characterization of Aerosol Collected Under Intense Puffing Regime from Three Batches of Menthol 5.0% at T=0**

| RT<br>[min] | RRT  | Name                                              | CAS #        | Confidence<br>Level | Estimated Amount µg/g |       |       |                 |       |       |                 |       |       | Avg<br>(µg/g) | Stdev | P-Value  | Group | Rationalization                                           |
|-------------|------|---------------------------------------------------|--------------|---------------------|-----------------------|-------|-------|-----------------|-------|-------|-----------------|-------|-------|---------------|-------|----------|-------|-----------------------------------------------------------|
|             |      |                                                   |              |                     | Batch HH26PG06A       |       |       | Batch HH26PH06A |       |       | Batch HH26PI06A |       |       |               |       |          |       |                                                           |
|             |      |                                                   |              |                     | Rep 1                 | Rep 2 | Rep 3 | Rep 1           | Rep 2 | Rep 3 | Rep 1           | Rep 2 | Rep 3 |               |       |          |       |                                                           |
| 11.28       | 0.83 | N-methylmyosmine                                  | 525-74-6     | high                | 17.7                  | 14.4  | 14.3  | 18              | 19.4  | 17.5  | 20              | 15.4  | 20.2  | 17.4          | 2.3   | 3.00E-05 | 4     | nicotine degradant                                        |
| 11.57       | 0.85 | 1-(1-methyl-5-(pyridin-3-yl)propan-2-one isomer 1 | 2416242-88-9 | high                | 9.1                   | 7     | 7.2   | 7.1             | 9.5   | 6.4   | 8.1             | 9.8   | 5.8   | 7.8           | 1.4   | NA       | 4     | nicotine degradant                                        |
| 12.24       | 0.9  | 1-(1-methyl-5-(pyridin-3-yl)propan-2-one isomer 2 | 2416242-88-9 | high                | 17.5                  | 13.6  | 13.2  | 13.8            | 12.1  | 12.6  | 14.5            | 15.4  | 15.3  | 14.2          | 1.7   | 1.10E-09 | 4     | nicotine degradant                                        |
| 13.16       | 0.97 | unknown benzyl alcohol related compound RRT 0.97  | NA           | NA                  | 42.2                  | 29.5  | 36.5  | 34.9            | 43.6  | 32.8  | 39.3            | 39.7  | 44    | 38.1          | 5     | 2.80E-09 | 4     | methoxylated, oxidized and ring opening of benzyl alcohol |
| 16.24       | 1.2  | 2-isopropyl-N, 2, 3-trimethylbutylbutamide        | 51115-67-4   | high                | 79.8                  | 102   | 87.9  | 93.7            | 80.7  | 90.6  | 88.3            | 92.6  | 91.8  | 89.7          | 6.8   | NA       | 1     | flavorant                                                 |
| 17.71       | 1.3  | unknown neryl acetate related compound RRT 1.30   | NA           | NA                  | 64                    | 39.9  | 45.3  | 54.8            | 61.8  | 47    | 62.1            | 69.2  | 69.4  | 57.1          | 10.8  | 1.20E-08 | 4     | demethylated and oxidized neryl acetate                   |
| 20.45       | 1.51 | (Z)-beta-damascone                                | 23726-92-3   | high                | 10.2                  | 7.3   | 13    | 13.8            | 19.7  | 10.1  | 10.3            | 9     | 15.5  | 12.1          | 3.8   | 4.10E-07 | 1     | flavorant                                                 |

**Table S11 LC-HRMS Characterization of Aerosol Collected Under Non-Intense Puffing Regime from Three Batches of Menthol 5.0% at T=0**

| RT<br>[min] | RRT  | Name                                                      | CAS #            | Confidence<br>Level | Estimated Amount µg/g |          |          |                 |          |          |                 |          |          | Avg<br>(µg/g) | Stdev | P-<br>Value  | Group | Rationalization                                                       |
|-------------|------|-----------------------------------------------------------|------------------|---------------------|-----------------------|----------|----------|-----------------|----------|----------|-----------------|----------|----------|---------------|-------|--------------|-------|-----------------------------------------------------------------------|
|             |      |                                                           |                  |                     | Batch HH26PG06A       |          |          | Batch HH26PH06A |          |          | Batch HH26PI06A |          |          |               |       |              |       |                                                                       |
|             |      |                                                           |                  |                     | Rep<br>1              | Rep<br>2 | Rep<br>3 | Rep<br>1        | Rep<br>2 | Rep<br>3 | Rep<br>1        | Rep<br>2 | Rep<br>3 |               |       |              |       |                                                                       |
| 2.14        | 0.16 | unknown PG_VG<br>related compound RRT<br>0.16             | NA               | NA                  | 4.1                   | 6.6      | 3.4      | 5.2             | 4.8      | 3.0      | 2.7             | 2.6      | 5.0      | 4.2           | 1.4   | NA           | 4     | dehydration of<br>PG VG to<br>form conjugate                          |
| 2.25        | 0.17 | unknown PG_VG<br>related compound RRT<br>0.17             | NA               | NA                  | 26.3                  | 32.2     | 29.7     | 32.1            | 33.1     | 30.1     | 29.0            | 36.5     | 39.8     | 32.1          | 4.1   | 2.00E-<br>04 | 4     | dehydration of<br>PG VG to<br>form conjugate                          |
| 2.44        | 0.18 | Hydroxyacetone                                            | 116-09-6         | high                | 3.6                   | 4.9      | 5.2      | 3.5             | 3.7      | 3.5      | 2.8             | 3.5      | 4.0      | 3.8           | 0.8   | 7.40E-<br>03 | 4     | dehydration of<br>glycerol and/or<br>oxidation of<br>PG               |
| 3.06        | 0.23 | unknown nicotine<br>related compound RRT<br>0.23          | NA               | NA                  | 23.5                  | 22.4     | 19.2     | 24.5            | 27.2     | 17.7     | 20.3            | 30.6     | 29.3     | 23.9          | 4.5   | 1.00E-<br>02 | 4     | nicotine<br>degradant                                                 |
| 4.23        | 0.31 | theobromine                                               | 83-67-0          | high                | 5.3                   | 6.1      | 6.3      | 5.5             | 5.8      | 5.0      | 5.0             | 6.2      | 6.6      | 5.7           | 0.6   | 8.50E-<br>15 | 1     | Flavorant                                                             |
| 6.98        | 0.51 | caffeine                                                  | 58-08-2          | confirmed           | 14.8                  | 20.3     | 15.8     | 22.4            | 24.2     | 28.9     | 15.6            | 24.1     | 18.1     | 20.5          | 4.8   | NA           | 1     | Flavorant                                                             |
| 10.00       | 0.74 | 2,3-dihydroxypropyl<br>benzoate                           | 3376-59-<br>8    | high                | 51.0                  | 57.3     | 75.9     | 62.7            | 59.6     | 54.1     | 57.2            | 63.7     | 73.8     | 61.7          | 8.4   | 1.30E-<br>05 | 4     | benzoic acid +<br>VG                                                  |
| 11.18       | 0.82 | N-methylmyosmine                                          | 525-74-6         | high                | 13.1                  | 13.1     | 15.7     | 16.5            | 19.3     | 12.1     | 14.1            | 16.5     | 18.0     | 15.4          | 2.4   | 5.70E-<br>04 | 4     | nicotine<br>degradant                                                 |
| 11.58       | 0.85 | 1-(1-methyl-5-<br>(pyridin-3-yl)propan-2-<br>one isomer 1 | 2416242-<br>88-9 | high                | 6.3                   | 7.0      | 8.7      | 6.2             | 7.0      | 7.6      | 5.6             | 7.4      | 7.6      | 7.0           | 0.9   | 7.80E-<br>11 | 4     | nicotine<br>degradant                                                 |
| 12.23       | 0.90 | 1-(1-methyl-5-<br>(pyridin-3-yl)propan-2-<br>one isomer 2 | 2416242-<br>88-9 | high                | 12.2                  | 13.5     | 15.6     | 12.0            | 14.8     | 9.4      | 11.3            | 14.2     | 11.8     | 12.7          | 1.9   | 3.40E-<br>12 | 4     | nicotine<br>degradant                                                 |
| 13.16       | 0.97 | unknown benzyl<br>alcohol related<br>compound RRT 0.97    | NA               | NA                  | 32.3                  | 38.0     | 36.0     | 34.5            | 37.2     | 31.2     | 35.0            | 40.4     | 41.4     | 36.2          | 3.4   | 2.40E-<br>04 | 4     | methoxylated,<br>oxidized and<br>ring opening<br>of benzyl<br>alcohol |
| 13.26       | 0.98 | 2-isopropyl-N, 2, 3-<br>trimethylbutylbutamide            | 51115-<br>67-4   | high                | 80.0                  | 83.8     | 80.1     | 87.7            | 81.5     | 82.1     | 90.2            | 81.8     | 70.3     | 81.9          | 5.6   | NA           | 1     | Flavorant                                                             |
| 17.70       | 1.30 | unknown neryl acetate<br>related compound RRT<br>1.30     | NA               | NA                  | 34.5                  | 40.5     | 56.2     | 46.8            | 39.1     | 34.4     | 46.3            | 63.1     | 69.9     | 47.9          | 12.6  | 1.30E-<br>08 | 4     | demethylated<br>and oxidized<br>neryl acetate                         |
| 20.41       | 1.50 | (Z)-beta-damascone                                        | 23726-<br>92-3   | high                | 6.1                   | 11.6     | 11.8     | 11.9            | 13.9     | 14.6     | 10.7            | 11.0     | 15.4     | 11.9          | 2.7   | NA           | 1     | Flavorant                                                             |



**Table S12 List of Compounds Detected in The Aerosol Collected from JUUL Menthol 3.0% at the Initial Timepoint (T=0) Under Intense and Non-Intense Puffing Regimes by Non-Targeted Analyses**

| Chemical                                | CAS#         | Potential Source                                                          | Smoke/Aerosol | Average (ug/g) | Group |
|-----------------------------------------|--------------|---------------------------------------------------------------------------|---------------|----------------|-------|
| (Z)-beta-damascone                      | 23726-92-3   | Flavorant                                                                 | Smoke         | 16.7           | 1     |
| 1-((ethoxydimethylsilyl)oxy)propan-2-ol | NA           | hydrolysis of E&L source compound (such as dodecamethylcyclohexasiloxane) | Aerosol       | 1              | 4     |
| 1-(beta nicotyrine)propan-2-one Iso-1   | 2416242-88-9 | Nicotine degradant                                                        | Aerosol       | 6.2            | 4     |
| 1-(beta nicotyrine)propan-2-one Iso-2   | 2416242-88-9 | Nicotine degradant                                                        | Aerosol       | 14             | 4     |
| 1,3-Dioxolane_4-methyl-2-pentyl-        | 1599-49-1    | PG + hexanal                                                              | Aerosol       | 2.5            | 4     |
| 1,3Dioxolane-2methanol_2,4dimethyl-Iso1 | 53951-43-2   | PG degradant                                                              | Aerosol       | 2.6            | 4     |
| 1,3Dioxolane-2methanol_2,4dimethyl-Iso2 | 53951-43-2   | PG degradant                                                              | Aerosol       | 1.4            | 4     |
| 1,3-Dioxolane-4-methanol_2,2-dimethyl-  | 100-79-8     | VG degradant                                                              | Smoke         | 35.5           | 4     |
| 1,3-Ethoxyethylideneglycerol            | NA           | VG degradant                                                              | Aerosol       | 4.1            | 4     |
| 1,8-Cineole                             | 470-82-6     | Flavorant                                                                 | Smoke         | 0.8            | 1     |
| 2-(4-methoxyphenyl)1-pyrroline          | NA           | Nicotine degradant                                                        | Aerosol       | 2.6            | 4     |
| 2-(4-methoxyphenyl)-1-pyrroline         | NA           | Nicotine degradant                                                        | Aerosol       | 3.5            | 4     |
| 2-(beta nicotyrine)acetaldehyde Iso-1   | NA           | Nicotine degradant                                                        | Aerosol       | 1.2            | 4     |
| 2-(beta nicotyrine)acetaldehyde Iso-2   | NA           | Nicotine degradant                                                        | Aerosol       | 1.5            | 4     |
| 2,3-dihydroxypropyl benzoate            | 3376-59-8    | benzoic acid + VG                                                         | Aerosol       | 40.2           | 4     |
| 2-ethyl-1-hexanol                       | 104-76-7     | E&L                                                                       | Smoke         | 0.9            | 3     |
| 2-hydroxypropyl benzoate                | 37086-84-3   | benzoic acid + PG (esterification)                                        | Aerosol       | 7.2            | 4     |
| 3-(1,3-dimethylpyrrol-2-yl)pyridine     | 78210-38-5   | Nicotine degradant                                                        | Smoke         | 2.6            | 4     |
| 3-(1,3-dimethylpyrrol-2-yl)pyridine Iso | 78210-38-5   | Nicotine degradant                                                        | Smoke         | 2              | 4     |
| 4-methoxybenzaldehyde                   | 123-11-5     | methoxylated benzaldehyde                                                 | Smoke         | 4              | 4     |
| 5-Methyl-2-(1-methylethyl)-Cyclohexanol | 1490-04-6    | Isomer of menthol (Flavorant)                                             | Smoke         | 4.4            | 1     |
| Acetic acid                             | 64-19-7      | Flavorant                                                                 | Smoke         | 11.3           | 1     |
| Acetylpyrazine                          | 22047-25-2   | Flavorant                                                                 | Smoke         | 2.2            | 1     |
| Benzaldehyde_2,3-dimethyl-              | 5779-93-1    | E&L                                                                       | Aerosol       | 1.4            | 3     |

|                                        |            |                                                                                                                          |         |      |   |
|----------------------------------------|------------|--------------------------------------------------------------------------------------------------------------------------|---------|------|---|
| Benzyl alcohol                         | 100-51-6   | Flavorant                                                                                                                | Smoke   | 37.7 | 1 |
| beta-Damascenone                       | 23726-93-4 | Flavorant                                                                                                                | Smoke   | 3.7  | 1 |
| Bis(2,6-hydroxymethyl) dioxane         | 54120-69-3 | 2VG dehydration                                                                                                          | Aerosol | 49.9 | 4 |
| Bis(2,6-hydroxymethyl) dioxane - Iso2  | 54120-69-3 | 2VG dehydration                                                                                                          | Aerosol | 38.2 | 4 |
| Bis(2,6-hydroxymethyl) dioxane - Iso3  | 54120-69-3 | 2VG dehydration                                                                                                          | Aerosol | 55.5 | 4 |
| Bis(2,6-hydroxymethyl) dioxane - Iso4  | 54120-69-3 | 2VG dehydration                                                                                                          | Aerosol | 28.4 | 4 |
| Bis(2,6-hydroxymethyl) dioxane - Iso5  | 54120-69-3 | 2VG dehydration                                                                                                          | Aerosol | 11.5 | 4 |
| Borneol                                | 464-45-9   | $\alpha$ -pinene protonation, capture of this carbocation by H2O accompanied by rearrangement of bicyclo carbon skeleton | Smoke   | 0.7  | 4 |
| Caffeine                               | 58-08-2    | Flavorant                                                                                                                | Smoke   | 14.2 | 1 |
| Decamethylcyclopentasiloxane Isomer 3  | 541-02-6   | E&L                                                                                                                      | Aerosol | 12.6 | 3 |
| Diethoxydimethylsilane                 | 78-62-6    | E&L                                                                                                                      | Aerosol | 4.3  | 3 |
| Dihydroxyacetone                       | 96-26-4    | Oxidation of glycerol                                                                                                    | Smoke   | 1.2  | 4 |
| Dipropylene glycol                     | 110-98-5   | 2PG - H2O                                                                                                                | Smoke   | 42.7 | 4 |
| Dodecamethylcyclohexasiloxane Isomer 1 | 540-97-6   | E&L                                                                                                                      | Aerosol | 20.8 | 3 |
| Ethanone_1-(2-pyridinyl)-              | 1122-62-9  | Flavorant                                                                                                                | Smoke   | 17.8 | 1 |
| Glyceryl monoacetate                   | 106-61-6   | VG esterification/transesterification                                                                                    | Smoke   | 14.4 | 4 |
| Hexadecamethylcyclooctasiloxane        | 556-68-3   | E&L                                                                                                                      | Aerosol | 1.9  | 3 |
| Hexadecanoic Acid                      | 57-10-3    | E&L                                                                                                                      | Smoke   | 11.5 | 3 |
| Hydroxyacetone                         | 116-09-6   | dehydration of glycerol and/or oxidation of PG                                                                           | Smoke   | 9.9  | 4 |
| Isomenthone                            | 491-07-6   | Flavorant                                                                                                                | Aerosol | 6.8  | 1 |
| Isopulegol Isomer                      | 7786-67-6  | reduction of isopulegone                                                                                                 | Aerosol | 0.8  | 4 |
| Lavandulol                             | 498-16-8   | Flavorant                                                                                                                | Aerosol | 2.5  | 1 |
| Linalool                               | 78-70-6    | Flavorant                                                                                                                | Smoke   | 1    | 1 |
| Linalyl acetate                        | 115-95-7   | Flavorant                                                                                                                | Aerosol | 1.5  | 1 |
| Menthofuran                            | 494-90-6   | Flavorant                                                                                                                | Smoke   | 1.3  | 1 |
| Menthone                               | 89-80-5    | oxidized menthol                                                                                                         | Smoke   | 22   | 4 |

|                                                  |            |                                                           |         |      |   |
|--------------------------------------------------|------------|-----------------------------------------------------------|---------|------|---|
| Menthyl acetate                                  | 89-48-5    | Flavorant                                                 | Aerosol | 3.6  | 1 |
| Methyl benzoate                                  | 93-58-3    | benzoic acid + MeOH                                       | Smoke   | 3.8  | 4 |
| N,2,3-trimethyl-2-isopropylbutamide              | 51115-67-4 | Flavorant                                                 | Aerosol | 81.2 | 1 |
| Nicotinealdehyde                                 | 500-22-1   | demethylation of 3-acetylpyridine                         | Smoke   | 1    | 4 |
| N-methyl-4-(3-pyridyl)-3-buten-1-amine           | 15585-43-0 | Nicotine degradant                                        | Aerosol | 2.5  | 4 |
| N-Methylanabasine                                | 24380-92-5 | Nicotine degradant                                        | Smoke   | 1.8  | 4 |
| N-methylmyosmine                                 | 525-74-6   | nicotine degradant                                        | Smoke   | 29   | 4 |
| N-Propylornicotine                               | 91907-45-8 | Nicotine degradant                                        | Aerosol | 1.6  | 4 |
| Octadecamethyl-cyclononasiloxane                 | 556-71-8   | E&L                                                       | Aerosol | 0.8  | 3 |
| p-Dioxane-2,5-dimethanol                         | 14236-12-5 | 2VG dehydration                                           | Aerosol | 13.5 | 4 |
| Phenol                                           | 108-95-2   | HPHC                                                      | Smoke   | 1.3  | 2 |
| Phenol_2-(1-phenylethyl)-                        | 4237-44-9  | Phenylethanol (from phenylethyl acetate ) + phenol        | Aerosol | 1.4  | 4 |
| Piperitone                                       | 89-81-6    | Flavorant                                                 | Smoke   | 0.8  | 1 |
| Piperonal                                        | 120-57-0   | Flavorant                                                 | Smoke   | 2.6  | 1 |
| Pulegone                                         | 89-82-7    | Flavorant                                                 | Aerosol | 2.7  | 1 |
| Pyridine                                         | 110-86-1   | Flavorant                                                 | Smoke   | 1.2  | 1 |
| Terpinen-4-ol                                    | 562-74-3   | Flavorant                                                 | Smoke   | 1.1  | 1 |
| Terpinyl propionate                              | 80-27-3    | Flavorant                                                 | Aerosol | 1.1  | 1 |
| Tetradecamethylcycloheptasiloxane                | 107-50-6   | E&L                                                       | Aerosol | 8.7  | 3 |
| theobromine                                      | 83-67-0    | Flavorant                                                 | Smoke   | 3.8  | 1 |
| Triacetin                                        | 102-76-1   | acetic acid + glycerol                                    | Smoke   | 1.6  | 4 |
| Unknown (RRT 0.559)                              | NA         | NR                                                        | Aerosol | 0.9  | 5 |
| Unknown (RRT 0.724)                              | NA         | NR                                                        | Aerosol | 3.7  | 5 |
| unknown benzyl alcohol related compound RRT 0.97 | NA         | methoxylated, oxidized and ring opening of benzyl alcohol | Aerosol | 15.1 | 4 |
| Unknown Long Chain Alkane (RRT 1.482)            | NA         | NR                                                        | Aerosol | 17   | 5 |
| Unknown Menthol Related Comp (RRT 0.520)         | NA         | Menthol (Flavorant) reaction                              | Aerosol | 5.6  | 4 |
| Unknown Menthol Related Comp.(RRT 0.503)         | NA         | Menthol (Flavorant) reaction                              | Aerosol | 1.9  | 4 |

|                                                 |    |                                         |         |      |   |
|-------------------------------------------------|----|-----------------------------------------|---------|------|---|
| Unknown Menthol Related Comp.(RRT 0.523)        | NA | Menthol (Flavorant) reaction            | Aerosol | 0.9  | 4 |
| unknown neryl acetate related compound RRT 1.30 | NA | demethylated and oxidized neryl acetate | Aerosol | 51.3 | 4 |
| Unknown Nic Related Comp.(RRT 0.743)            | NA | Nicotine degradant                      | Aerosol | 1.2  | 4 |
| Unknown Nic. Related Comp. (RRT 1.098)          | NA | Nicotine degradant                      | Aerosol | 1.8  | 4 |
| Unknown Nic. Related Comp.(RRT 0.849)           | NA | Nicotine degradant                      | Aerosol | 4.1  | 4 |
| Unknown Nic.Related Comp.(RRT 0.840)            | NA | Nicotine degradant                      | Aerosol | 3.2  | 4 |
| Unknown Nic.Related Comp.(RRT 0.923)A           | NA | Nicotine degradant                      | Aerosol | 1.3  | 4 |
| Unknown Nic.Related Comp.(RRT 0.956)            | NA | Nicotine degradant                      | Aerosol | 1.5  | 4 |
| Unknown Nic.Related Comp.(RRT 0.970)            | NA | Nicotine degradant                      | Aerosol | 4.4  | 4 |
| Unknown Nic.Related Comp.(RRT 1.012)            | NA | Nicotine degradant                      | Aerosol | 4.3  | 4 |
| unknown nicotine related compound RRT 0.24      | NA | nicotine degradant                      | Aerosol | 36.3 | 4 |
| unknown PG_VG related compound RRT 0.16a        | NA | dehydration of PG VG to form conjugate  | Aerosol | 9.4  | 4 |

**Table S13 List of Compounds Detected in The Aerosol Collected from JUUL Menthol 5.0% at the Initial Timepoint (T=0) Under Intense and Non-Intense Puffing Regimes by Non-Targeted Analyses**

| Chemical                                | CAS#         | Potential Source                                                          | Smoke/Aerosol | Average (ug/g) | Group |
|-----------------------------------------|--------------|---------------------------------------------------------------------------|---------------|----------------|-------|
| (Z)-beta-Damascone                      | 23726-92-3   | Flavorant                                                                 | Smoke         | 32.8           | 1     |
| 1-((ethoxydimethylsilyl)oxy)propan-2-ol | NA           | hydrolysis of E&L source compound (such as dodecamethylcyclohexasiloxane) | Aerosol       | 3.6            | 4     |
| 1-(beta nicotyrine)propan-2-one Iso-1   | 2416242-88-9 | Nicotine degradant                                                        | Aerosol       | 10.8           | 4     |
| 1-(beta nicotyrine)propan-2-one Iso-2   | 2416242-88-9 | Nicotine degradant                                                        | Aerosol       | 24.8           | 4     |
| 1,3-Dioxolane_4-methyl-2-pentyl-        | 1599-49-1    | PG + hexanal                                                              | Aerosol       | 6.7            | 4     |
| 1,3Dioxolane-2methanol_2,4dimethyl-Iso1 | 53951-43-2   | PG degradant                                                              | Aerosol       | 5.4            | 4     |
| 1,3Dioxolane-2methanol_2,4dimethyl-Iso2 | 53951-43-2   | PG degradant                                                              | Aerosol       | 2.7            | 4     |
| 1,3-Dioxolane-4-methanol_2,2-dimethyl-  | 100-79-8     | VG degradant                                                              | Smoke         | 57.9           | 4     |
| 1,3-Ethoxyethylideneglycerol            | NA           | VG degradant                                                              | Aerosol       | 5.9            | 4     |
| 1,8-Cineole                             | 470-82-6     | Flavorant                                                                 | Smoke         | 0.7            | 1     |
| 2-((ethoxydimethylsilyl)oxy)propan-1-ol | NA           | hydrolysis of E&L source compound (such as dodecamethylcyclohexasiloxane) | Aerosol       | 1.8            | 4     |
| 2-(4-methoxyphenyl)-1-pyrroline         | NA           | Nicotine degradant                                                        | Aerosol       | 4.6            | 4     |
| 2-(beta nicotyrine)acetaldehyde Iso-1   | NA           | Nicotine degradant                                                        | Aerosol       | 2.4            | 4     |
| 2,3-dihydroxypropyl benzoate            | 3376-59-8    | benzoic acid + VG                                                         | Aerosol       | 74.8           | 4     |
| 2-hydroxypropyl benzoate                | 37086-84-3   | benzoic acid with alcohol esterification                                  | Aerosol       | 12.9           | 4     |
| 3-(1,3-dimethylpyrrol-2-yl)pyridine     | 78210-38-5   | Nicotine degradant                                                        | Smoke         | 4.9            | 4     |
| 3-(1,3-dimethylpyrrol-2-yl)pyridine Iso | 78210-38-5   | Nicotine degradant                                                        | Smoke         | 3.6            | 4     |
| 4-methoxybenzaldehyde                   | 123-11-5     | methoxylated benzaldehyde                                                 | Smoke         | 3.6            | 4     |
| 5-Methyl-2-(1-methylethyl)-Cyclohexanol | 1490-04-6    | Isomer of menthol (Flavorant)                                             | Smoke         | 4.4            | 1     |
| Acetic acid                             | 64-19-7      | Flavorant                                                                 | Smoke         | 10.6           | 1     |
| Acetophenone                            | 98-86-2      | NR                                                                        | Smoke         | 1.1            | 5     |
| Acetylpyrazine                          | 22047-25-2   | Flavorant                                                                 | Smoke         | 2              | 1     |
| Benzaldehyde_2,3-dimethyl-              | 5779-93-1    | E&L                                                                       | Aerosol       | 1.5            | 3     |
| Benzyl alcohol                          | 100-51-6     | Flavorant                                                                 | Smoke         | 40             | 1     |

|                                        |            |                                                |         |      |   |
|----------------------------------------|------------|------------------------------------------------|---------|------|---|
| beta-Damascenone                       | 23726-93-4 | Flavorant                                      | Smoke   | 3.4  | 1 |
| Bis(2,6 hydroxymethyl) dioxane - Iso3  | 54120-69-3 | 2VG dehydration                                | Aerosol | 59.6 | 4 |
| Bis(2,6-hydroxymethyl) dioxane         | 54120-69-3 | 2VG dehydration                                | Aerosol | 57.8 | 4 |
| Bis(2,6-hydroxymethyl) dioxane - Iso2  | 54120-69-3 | 2VG dehydration                                | Aerosol | 7.5  | 4 |
| Bis(2,6-hydroxymethyl) dioxane - Iso4  | 54120-69-3 | 2VG dehydration                                | Aerosol | 33.3 | 4 |
| Bis(2,6-hydroxymethyl) dioxane - Iso5  | 54120-69-3 | 2VG dehydration                                | Aerosol | 13.4 | 4 |
| Caffeine                               | 58-08-2    | Flavorant                                      | Smoke   | 14.3 | 1 |
| Decamethylcyclopentasiloxane Isomer 2  | 541-02-6   | E&L                                            | Aerosol | 9.8  | 3 |
| Diethoxydimethylsilane                 | 78-62-6    | E&L                                            | Aerosol | 17.4 | 3 |
| Dihydroxyacetone                       | 96-26-4    | oxidation of glycerol                          | Smoke   | 1.3  | 4 |
| Dipropylene glycol                     | 110-98-5   | PG degradant                                   | Smoke   | 44.3 | 4 |
| Ethanone_1-(2-pyridinyl)-              | 1122-62-9  | Flavorant                                      | Smoke   | 16.7 | 1 |
| Glyceryl monoacetate                   | 106-61-6   | VG esterification/transesterification          | Smoke   | 25.6 | 4 |
| Hexadecanoic Acid                      | 57-10-3    | E&L                                            | Smoke   | 3.4  | 3 |
| Hydroxyacetone                         | 116-09-6   | dehydration of glycerol and/or oxidation of PG | Smoke   | 9.8  | 4 |
| Isomenthone                            | 491-07-6   | Flavorant                                      | Aerosol | 6.4  | 1 |
| Isopulegol                             | 89-79-2    | reduction of isopulegone                       | Aerosol | 2.6  | 4 |
| Lavandulol                             | 498-16-8   | Flavorant                                      | Aerosol | 1.8  | 1 |
| Linalool                               | 78-70-6    | Flavorant                                      | Smoke   | 1    | 1 |
| Linalyl acetate                        | 115-95-7   | Flavorant                                      | Aerosol | 1.3  | 1 |
| Menthofuran                            | 494-90-6   | Flavorant                                      | Smoke   | 0.9  | 1 |
| Menthone                               | 89-80-5    | oxidized menthol                               | Smoke   | 16.9 | 4 |
| Menthyl acetate                        | 89-48-5    | Flavorant                                      | Aerosol | 3.4  | 1 |
| Methyl benzoate                        | 93-58-3    | benzoic acid + MeOH                            | Smoke   | 8.1  | 4 |
| N,2,3-trimethyl-2-isopropylbutamide    | 51115-67-4 | Flavorant                                      | Aerosol | 75   | 1 |
| N-Formylnormicotine                    | 3000-81-5  | Nicotine degradant                             | Smoke   | 0.8  | 4 |
| Nicotinaldehyde                        | 500-22-1   | demethylation of 3-acetylpyridine              | Smoke   | 1.5  | 4 |
| N-methyl-4-(3-pyridyl)-3-buten-1-amine | 15585-43-0 | Nicotine degradant                             | Aerosol | 4.8  | 4 |
| N-Methylanabasine                      | 24380-92-5 | Nicotine degradant                             | Smoke   | 3.1  | 4 |
| N-methylmyosmine                       | 525-74-6   | nicotine degradant                             | Smoke   | 17.4 | 4 |

|                                                  |            |                                                                |         |      |   |
|--------------------------------------------------|------------|----------------------------------------------------------------|---------|------|---|
| N-Methylnicotinamide                             | 114-33-0   | Nicotine degradant                                             | Smoke   | 1.2  | 4 |
| N-Propylnornicotine                              | 91907-45-8 | Nicotine degradant                                             | Aerosol | 3.2  | 4 |
| Octadecanoic acid                                | 57-11-4    | E&L                                                            | Smoke   | 2    | 3 |
| p-Dioxane-2,5-dimethanol                         | 14236-12-5 | 2VG dehydration                                                | Aerosol | 15.1 | 4 |
| Phenol                                           | 108-95-2   | HPHC                                                           | Smoke   | 1.9  | 2 |
| Phenol_2-(1-phenylethyl)-                        | 4237-44-9  | Phenylethanol (from phenylethyl acetate ) + phenol             | Aerosol | 1.1  | 4 |
| Piperitone                                       | 89-81-6    | Flavorant                                                      | Smoke   | 0.7  | 1 |
| Piperonal                                        | 120-57-0   | Flavorant                                                      | Smoke   | 2    | 1 |
| Propanedioic acid                                | 141-82-2   | propionic acid to hydroxypropionic acid, followed by oxidation | Smoke   | 31.6 | 4 |
| Pulegone                                         | 89-82-7    | Flavorant                                                      | Aerosol | 1.9  | 1 |
| Pyridine                                         | 110-86-1   | Flavorant                                                      | Smoke   | 1.4  | 1 |
| Terpinen-4-ol                                    | 562-74-3   | Flavorant                                                      | Smoke   | 0.9  | 1 |
| Terpinyl propionate                              | 80-27-3    | Flavorant                                                      | Aerosol | 0.8  | 1 |
| theobromine                                      | 83-67-0    | Flavorant                                                      | Smoke   | 5.7  | 1 |
| Unknown (RRT 0.262)                              | NA         | NR                                                             | Aerosol | 3.2  | 5 |
| Unknown (RRT 1.098)                              | NA         | NR                                                             | Aerosol | 1.3  | 5 |
| Unknown (RRT 1.132)                              | NA         | NR                                                             | Aerosol | 1    | 5 |
| Unknown (RRT 1.175)                              | NA         | NR                                                             | Aerosol | 1.7  | 5 |
| unknown benzyl alcohol related compound RRT 0.97 | NA         | methoxylated, oxidized and ring opening of benzyl alcohol      | Aerosol | 38.1 | 4 |
| Unknown Menthol Related Comp.(RRT 0.503)         | NA         | Menthol (Flavorant) reaction                                   | Aerosol | 2.1  | 4 |
| unknown neryl acetate related compound RRT 1.30  | NA         | demethylated and oxidized neryl acetate                        | Aerosol | 57.1 | 4 |
| Unknown Nic. Related Comp. (RRT 0.575)           | NA         | Nicotine degradant                                             | Aerosol | 1.7  | 4 |
| Unknown Nic. Related Comp. (RRT 0.663)           | NA         | Nicotine degradant                                             | Aerosol | 3.8  | 4 |
| Unknown Nic. Related Comp. (RRT 0.670)           | NA         | Nicotine degradant                                             | Aerosol | 0.9  | 4 |
| Unknown Nic. Related Comp. (RRT 0.708)           | NA         | Nicotine degradant                                             | Aerosol | 0.8  | 4 |
| Unknown Nic. Related Comp. (RRT 0.727)           | NA         | Nicotine degradant                                             | Aerosol | 4    | 4 |
| Unknown Nic. Related Comp. (RRT 0.777)           | NA         | Nicotine degradant                                             | Aerosol | 0.8  | 4 |
| Unknown Nic. Related Comp. (RRT 0.840)           | NA         | Nicotine degradant                                             | Aerosol | 0.7  | 4 |
| Unknown Nic. Related Comp. (RRT 0.849)           | NA         | Nicotine degradant                                             | Aerosol | 4.1  | 4 |
| Unknown Nic. Related Comp. (RRT 0.855)           | NA         | Nicotine degradant                                             | Aerosol | 6.6  | 4 |

|                                            |    |                                        |         |      |   |
|--------------------------------------------|----|----------------------------------------|---------|------|---|
| Unknown Nic. Related Comp. (RRT 0.956)     | NA | Nicotine degradant                     | Aerosol | 1    | 4 |
| Unknown Nic. Related Comp. (RRT 0.970)     | NA | Nicotine degradant                     | Aerosol | 5.2  | 4 |
| Unknown Nic. Related Comp. (RRT 1.012)     | NA | Nicotine degradant                     | Aerosol | 4.4  | 4 |
| Unknown Nic. Related Comp. (RRT 1.098)     | NA | Nicotine degradant                     | Aerosol | 2.1  | 4 |
| Unknown Nic. Related Comp. (RRT 1.246)     | NA | Nicotine degradant                     | Aerosol | 2.7  | 4 |
| unknown nicotine related compound RRT 0.23 | NA | nicotine degradant                     | Aerosol | 30.9 | 4 |
| unknown nicotine related compound RRT 0.71 | NA | nicotine degradant                     | Aerosol | 8.2  | 4 |
| unknown PG_VG related compound RRT 0.16    | NA | dehydration of PG VG to form conjugate | Aerosol | 4.2  | 4 |
| unknown PG_VG related compound RRT 0.17    | NA | dehydration of PG VG to form conjugate | Aerosol | 32.6 | 4 |
| Unknown Siloxane (RRT 0.515)               | NA | E&L                                    | Aerosol | 1    | 3 |
| Unknown Siloxane (RRT 0.532)               | NA | E&L                                    | Aerosol | 0.7  | 3 |
| Unknown Siloxane (RRT 0.540)               | NA | E&L                                    | Aerosol | 1.6  | 3 |
| Unknown Siloxane (RRT 0.542)               | NA | E&L                                    | Aerosol | 1.2  | 3 |

**Table S14.** Confidence Levels of Compounds Identified by LC–HRMS NTA.

|           |                                                                                                                      |
|-----------|----------------------------------------------------------------------------------------------------------------------|
| Confirmed | Comparison to standard reference material                                                                            |
| High      | High mass accuracy measurement generated a molecular formula which was consistent with a rationalized identification |
| Medium    | Automated search of a library with MS/MS spectral peaks in common                                                    |
| Low       | Manual search of online library for best spectral match                                                              |
| NA        | Not applicable                                                                                                       |



**Table S15.** Confidence Levels of Compounds Identified by GC–MS NTA.

|           |                                                                                                                          |
|-----------|--------------------------------------------------------------------------------------------------------------------------|
| Confirmed | Identification confirmed by comparison to standard reference material by high and unit mass resolution mass spectrometry |
| High      | A mass spectrum match factor score of 850 to 1000                                                                        |
| Medium    | A mass spectrum match factor score of 700 to 849                                                                         |
| Low       | A mass spectrum match factor score of 500 to 699                                                                         |
| NA        | Not Applicable                                                                                                           |
